# Supplementary material for: Early-Wood vs. Late-Wood in Scots Pine: Finding Stable Relationships in Elemental Distribution
Source: MDPI journal article supplement (doi:10.3390/sci6010004), 2023-12-28
Supplement: s1 [file s1]

Average elemental contents in tree rings of six Scots pines

Legend: ear = early-wood, lat = late-wood

Units: humidity (Hum) - %%, temperature (T) - grad C, precipitations (Prec) - mm, wind speed (Wind) - m/sec, other figures are dimensionless

North

Pine #1

| Year | Al_lat | Al_ear | Ca_lat | Ca_ear | Cl_lat | Cl_ear | Cu_lat | Cu_ear | Fe_lat | Fe_ear | Hg_lat | Hg_ear | inc_lat  | inc_ear  | K_lat  | K_ear  | Mn_lat | Mn_ear | P_lat | P_ear | S_lat | S_ear | Si_lat | Si_ear | Sr_lat | Sr_ear | Ti_lat | Ti_ear | Zn_lat | Zn_ear | lv_jn_ind | lv_jl_ind | lv_au_ind | lv-Vys_jn | lv-Vys_jl | lv-Vys_aug | Hum_may | Hum_jn | Hum_jl | Hum_aug | T_may | T_jn  | T_jl  | T_aug | Prec_jn | Prec_jl | Prec_aug | Wind_my | Wind_jn | Wind_jl | Wind_aug |
|------|--------|--------|--------|--------|--------|--------|--------|--------|--------|--------|--------|--------|----------|----------|--------|--------|--------|--------|-------|-------|-------|-------|--------|--------|--------|--------|--------|--------|--------|--------|-----------|-----------|-----------|-----------|-----------|------------|---------|--------|--------|---------|-------|-------|-------|-------|---------|---------|----------|---------|---------|---------|----------|
| 1981 | 49.25  | 43.35  | 510.00 | 640.30 | 2.00   | 2.05   | 269.25 | 163.65 | 50.50  | 71.15  | 20.25  | 3.30   | 47058.25 | 46936.15 | 82.50  | 86.00  | 428.50 | 447.95 | 10.00 | 3.05  | 0.00  | 1.30  | 11.50  | 7.75   | 141.25 | 245.65 | 15.75  | 20.60  | 239.50 | 120.60 | 0.267     | 1.200     | 1.422     | 0.011     | 0.102     | 0.130      | 47.7    | 56.4   | 68.8   | 76.4    | 12.15 | 17.13 | 16.67 | 14.94 | 15.3    | 99      | 88.2     | 3.2     | 1.7     | 2.1     | 1        |
| 1982 | 48.75  | 41.50  | 516.75 | 623.20 | 1.00   | 1.15   | 246.00 | 187.90 | 34.00  | 80.35  | 26.50  | 25.50  | 46874.50 | 47074.65 | 92.50  | 101.15 | 470.00 | 447.15 | 6.75  | 3.55  | 10.75 | 3.35  | 14.00  | 14.30  | 43.75  | 212.30 | 28.75  | 24.45  | 278.75 | 142.85 | 0.403     | 0.954     | 0.550     | 0.018     | 0.083     | 0.050      | 53.2    | 56.3   | 72.5   | 70.6    | 10.00 | 17.06 | 17.21 | 15.34 | 24.5    | 72.8    | 42.9     | 2.3     | 2.1     | 1.8     | 2        |
| 1983 | 57.00  | 41.61  | 502.00 | 580.22 | 0.00   | 1.61   | 300.75 | 164.78 | 34.50  | 69.72  | 32.50  | 2.78   | 46755.75 | 46934.06 | 107.50 | 108.06 | 461.50 | 418.28 | 6.00  | 3.11  | 5.25  | 1.06  | 20.00  | 9.33   | 72.50  | 275.78 | 19.50  | 19.11  | 258.75 | 125.83 | 0.947     | 1.212     | 0.681     | 0.044     | 0.107     | 0.061      | 50.7    | 54.3   | 68.8   | 75.7    | 7.59  | 16.11 | 16.45 | 15.26 | 61.2    | 102.8   | 43.5     | 2.4     | 1.9     | 1.7     | 1.5      |
| 1984 | 53.50  | 46.25  | 527.00 | 547.75 | 4.00   | 0.00   | 300.00 | 160.92 | 67.50  | 89.83  | 0.00   | 1.17   | 46981.00 | 46838.42 | 104.00 | 112.50 | 404.50 | 384.08 | 10.00 | 2.25  | 11.00 | 0.00  | 38.50  | 8.75   | 174.00 | 213.67 | 24.50  | 18.08  | 266.50 | 113.25 | 0.833     | 1.059     | 0.549     | 0.041     | 0.094     | 0.049      | 60.6    | 64     | 75.9   | 72.1    | 8.51  | 15.90 | 16.98 | 15.50 | 44.3    | 72      | 40.7     | 2.2     | 1.8     | 1.4     | 1.6      |
| 1985 | 46.40  | 43.33  | 465.00 | 566.08 | 0.00   | 0.92   | 244.40 | 178.58 | 64.20  | 92.42  | 0.00   | 15.58  | 46826.20 | 46810.33 | 120.60 | 123.00 | 407.00 | 387.33 | 9.00  | 9.92  | 5.60  | 1.67  | 11.00  | 10.58  | 105.80 | 260.83 | 6.00   | 22.25  | 230.60 | 139.00 | 1.778     | 1.286     | 0.865     | 0.091     | 0.115     | 0.078      | 53.9    | 66.7   | 75.2   | 76.6    | 8.28  | 14.28 | 18.04 | 15.25 | 84.5    | 95.1    | 53.2     | 2.9     | 1.7     | 1.2     | 1.7      |
| 1986 | 48.50  | 46.09  | 539.75 | 530.00 | 5.50   | 2.91   | 301.50 | 207.18 | 41.00  | 93.82  | 0.00   | 0.00   | 46876.50 | 46846.09 | 104.75 | 98.82  | 447.75 | 357.00 | 15.50 | 4.36  | 4.25  | 1.27  | 30.25  | 8.82   | 103.25 | 254.55 | 14.50  | 18.64  | 305.75 | 73.82  | 0.553     | 0.476     | 0.779     | 0.030     | 0.043     | 0.070      | 59.7    | 63     | 68.2   | 78.2    | 8.63  | 14.99 | 19.86 | 15.47 | 31.6    | 49.3    | 45.3     | 2.3     | 1.8     | 2       | 1.9      |
| 1987 | 57.25  | 34.67  | 490.25 | 568.83 | 0.00   | 6.17   | 300.50 | 153.00 | 44.00  | 103.00 | 0.00   | 0.00   | 46857.50 | 46763.00 | 108.25 | 97.50  | 410.00 | 382.50 | 13.75 | 5.83  | 2.00  | 3.50  | 29.75  | 11.00  | 42.00  | 185.50 | 4.75   | 9.67   | 277.00 | 89.50  | 1.477     | 0.862     | 0.784     | 0.082     | 0.078     | 0.071      | 51.7    | 58.8   | 69.8   | 77.6    | 9.86  | 12.32 | 17.98 | 16.69 | 84.8    | 77.9    | 50       | 2.2     | 2.9     | 2.1     | 1.7      |
| 1988 | 56.00  | 41.88  | 480.50 | 565.88 | 1.25   | 2.00   | 268.75 | 191.50 | 41.50  | 87.88  | 0.00   | 4.38   | 46729.75 | 46759.13 | 66.25  | 100.13 | 376.25 | 353.38 | 17.75 | 3.25  | 1.25  | 0.00  | 38.75  | 9.63   | 75.75  | 202.00 | 12.75  | 20.75  | 219.75 | 151.63 | 0.934     | 3.208     | 1.421     | 0.054     | 0.288     | 0.130      | 55.2    | 64.2   | 77.8   | 80.1    | 8.46  | 13.21 | 16.12 | 15.18 | 50.4    | 194.9   | 75.3     | 2.9     | 3.2     | 2.1     | 1.7      |
| 1989 | 68.60  | 42.14  | 510.40 | 523.00 | 14.20  | 1.00   | 193.40 | 158.29 | 69.00  | 101.43 | 15.80  | 0.00   | 46633.20 | 46909.57 | 82.60  | 90.71  | 338.60 | 346.14 | 6.60  | 5.43  | 0.00  | 0.00  | 28.60  | 12.57  | 149.60 | 231.29 | 13.80  | 8.29   | 213.20 | 118.29 | 0.695     | 0.516     | 0.432     | 0.041     | 0.046     | 0.040      | 48.8    | 64.3   | 64.8   | 69      | 11.59 | 13.41 | 18.43 | 15.04 | 38.8    | 55.4    | 35.7     | 2.9     | 2.1     | 1.9     | 2        |
| 1990 | 40.00  | 53.75  | 610.00 | 563.25 | 0.00   | 1.50   | 258.50 | 179.75 | 69.50  | 107.00 | 3.50   | 19.75  | 46738.50 | 46740.00 | 118.50 | 91.00  | 425.50 | 383.25 | 23.00 | 5.00  | 14.50 | 0.00  | 23.00  | 18.00  | 55.00  | 192.25 | 0.00   | 13.75  | 190.00 | 168.25 | 1.162     | 1.346     | 1.864     | 0.070     | 0.120     | 0.174      | 50.3    | 63.5   | 73.8   | 78.9    | 13.30 | 15.86 | 19.37 | 16.50 | 76.9    | 111.7   | 113.8    | 3.3     | 2       | 1.3     | 1.7      |
| 1991 | 64.50  | 33.17  | 517.50 | 588.17 | 10.00  | 11.50  | 196.50 | 190.33 | 32.50  | 165.67 | 0.00   | 0.00   | 46784.50 | 46984.67 | 98.50  | 108.67 | 342.50 | 334.33 | 9.50  | 1.50  | 0.00  | 1.50  | 15.50  | 18.67  | 161.00 | 255.50 | 14.00  | 23.67  | 174.50 | 159.00 | 0.712     | 1.589     | 1.252     | 0.044     | 0.141     | 0.118      | 54.4    | 59     | 79     | 77.7    | 8.87  | 16.46 | 19.51 | 15.36 | 55.6    | 105.9   | 77.2     | 2.7     | 2.1     | 1.7     | 1.8      |

Pine #2

|      | Al_lat | Al_ear | Ca_lat | Ca_ear | Cl_lat | Cl_ear | Cu_lat | Cu_ear | Fe_lat | Fe_ear | Hg_lat | Hg_ear | inc_lat  | inc_ear  | K_lat  | K_ear  | Mn_lat | Mn_ear | P_lat | P_ear | S_lat | S_ear | Si_lat | Si_ear | Sr_lat | Sr_ear | Ti_lat | Ti_ear | Zn_lat | Zn_ear | lv_jn_ind | lv_jl_ind | lv_au_ind | lv-Vys_jn | lv-Vys_jl | lv-Vys_aug | Hum_may | Hum_jn | Hum_jl | Hum_aug | T_may | T_jn  | T_jl  | T_aug | Prec_jn | Prec_jl | Prec_aug | Wind_my | Wind_jn | Wind_jl | Wind_aug |     |
|------|--------|--------|--------|--------|--------|--------|--------|--------|--------|--------|--------|--------|----------|----------|--------|--------|--------|--------|-------|-------|-------|-------|--------|--------|--------|--------|--------|--------|--------|--------|-----------|-----------|-----------|-----------|-----------|------------|---------|--------|--------|---------|-------|-------|-------|-------|---------|---------|----------|---------|---------|---------|----------|-----|
| 1981 | 52.38  | 44.88  | 450.75 | 588.38 | 0.00   | 1.88   | 233.50 | 132.81 | 43.63  | 102.13 | 0.00   | 5.94   | 47353.75 | 47544.13 | 56.25  | 64.00  | 257.75 | 283.25 | 8.63  | 3.19  | 3.50  | 0.88  | 15.50  | 12.50  | 150.50 | 283.44 | 8.75   | 26.00  | 230.75 | 136.19 | 0.267     | 1.200     | 1.422     | 0.011     | 0.102     | 0.130      | 47.7    | 56.4   | 68.8   | 76.4    | 12.15 | 17.13 | 16.67 | 14.94 | 15.3    | 99      | 88.2     | 3.2     | 1.7     | 2.1     | 1        |     |
| 1982 | 54.73  | 46.42  | 416.82 | 500.83 | 1.36   | 0.00   | 197.27 | 142.33 | 36.64  | 72.50  | 2.91   | 2.00   | 47409.00 | 48025.83 | 60.91  | 50.33  | 250.36 | 271.58 | 7.82  | 2.75  | 0.36  | 0.00  | 20.18  | 11.67  | 138.55 | 231.33 | 9.45   | 10.67  | 242.18 | 128.08 | 0.403     | 0.954     | 0.550     | 0.018     | 0.083     | 0.050      | 53.2    | 56.3   | 72.5   | 70.6    | 10.00 | 17.06 | 17.21 | 15.34 | 24.5    | 72.8    | 42.9     | 2.3     | 2.1     | 1.8     | 2        |     |
| 1983 | 50.00  | 53.20  | 418.63 | 460.87 | 0.00   | 0.47   | 166.88 | 139.20 | 52.25  | 64.33  | 0.00   | 2.80   | 47512.25 | 47616.87 | 58.25  | 61.07  | 231.50 | 247.07 | 5.25  | 3.33  | 0.50  | 2.20  | 9.75   | 18.07  | 99.50  | 316.13 | 11.25  | 7.73   | 173.50 | 158.33 | 0.947     | 1.212     | 0.681     | 0.044     | 0.107     | 0.061      | 50.7    | 54.3   | 68.8   | 75.7    | 7.59  | 16.11 | 16.45 | 15.26 | 61.2    | 102.8   | 43.5     | 2.4     | 1.9     | 1.7     | 1.5      |     |
| 1984 | 55.33  | 46.93  | 426.00 | 459.93 | 0.00   | 0.64   | 172.33 | 157.86 | 92.33  | 65.43  | 2.67   | 0.64   | 47444.00 | 47341.43 | 75.00  | 62.36  | 246.67 | 230.71 | 3.00  | 4.07  | 0.00  | 1.86  | 20.67  | 13.86  | 221.67 | 283.00 | 30.67  | 15.93  | 204.33 | 185.43 | 0.833     | 1.059     | 0.549     | 0.041     | 0.094     | 0.049      | 60.6    | 64     | 75.9   | 72.1    | 8.51  | 15.90 | 16.98 | 15.50 | 44.3    | 72      | 40.7     | 2.2     | 1.8     | 1.4     | 1.6      |     |
| 1985 | 55.60  | 49.77  | 410.60 | 470.08 | 2.80   | 0.00   | 170.80 | 145.54 | 74.20  | 76.31  | 3.20   | 5.08   | 47681.40 | 47512.00 | 88.40  | 85.69  | 244.60 | 246.38 | 3.20  | 2.54  | 0.00  | 3.62  | 16.80  | 12.08  | 170.00 | 289.46 | 13.20  | 21.31  | 206.60 | 159.23 | 1.778     | 1.286     | 0.865     | 0.091     | 0.115     | 0.078      | 53.9    | 66.7   | 75.2   | 76.6    | 8.28  | 14.28 | 18.04 | 15.25 | 84.5    | 95.1    | 53.2     | 2.9     | 1.7     | 1.2     | 1.7      |     |
| 1986 | 34.40  | 46.73  | 399.40 | 454.73 | 0.00   | 0.00   | 194.60 | 196.36 | 50.60  | 66.45  | 0.00   | 0.00   | 47875.40 | 47865.55 | 101.60 | 105.36 | 238.00 | 240.64 | 11.60 | 7.09  | 0.00  | 1.09  | 13.00  | 18.00  | 242.00 | 231.18 | 16.00  | 27.36  | 177.60 | 127.09 | 0.553     | 0.476     | 0.779     | 0.030     | 0.043     | 0.070      | 59.7    | 63     | 68.2   | 78.2    | 8.63  | 14.99 | 19.86 | 15.47 | 31.6    | 49.3    | 45.3     | 2.3     | 1.8     | 2       | 1.9      |     |
| 1987 | 50.00  | 60.60  | 393.80 | 419.00 | 5.60   | 1.40   | 158.60 | 213.00 | 22.40  | 48.80  | 0.00   | 5.00   | 47631.80 | 47728.60 | 80.80  | 99.80  | 238.60 | 214.80 | 0.00  | 5.00  | 2.40  | 0.00  | 24.40  | 8.60   | 252.80 | 193.60 | 8.80   | 10.80  | 186.60 | 152.60 | 1.477     | 0.862     | 0.784     | 0.082     | 0.078     | 0.071      | 51.7    | 58.8   | 69.8   | 77.6    | 9.86  | 12.32 | 17.98 | 16.69 | 84.8    | 77.9    | 50       | 2.2     | 2.9     | 2.1     | 1.7      |     |
| 1988 | 39.25  | 52.33  | 400.50 | 407.67 | 0.00   | 0.00   | 193.00 | 191.33 | 71.75  | 91.17  | 0.00   | 0.00   | 47863.25 | 47874.50 | 101.25 | 96.67  | 232.00 | 200.50 | 1.75  | 1.50  | 0.00  | 0.00  | 10.50  | 19.50  | 161.00 | 228.00 | 22.25  | 21.50  | 160.50 | 151.33 | 0.934     | 3.208     | 1.421     | 0.054     | 0.288     | 0.130      | 55.2    | 64.2   | 77.8   | 80.1    | 8.46  | 13.21 | 16.12 | 15.18 | 50.4    | 194.9   | 75.3     | 2.9     | 3.2     | 2.1     | 1.7      |     |
| 1989 | 48.33  | 50.13  | 346.67 | 418.75 | 0.00   | 0.00   | 212.67 | 155.25 | 46.00  | 88.13  | 0.00   | 0.63   | 47805.67 | 47739.63 | 73.67  | 101.50 | 220.33 | 231.63 | 16.00 | 1.13  | 0.00  | 0.00  | 29.33  | 9.38   | 118.33 | 253.88 | 14.67  | 34.63  | 167.67 | 160.25 | 0.695     | 0.516     | 0.432     | 0.041     | 0.046     | 0.040      | 48.8    | 64.3   | 64.8   | 69      | 11.59 | 13.41 | 18.43 | 15.04 | 38.8    | 55.4    | 35.7     | 2.9     | 2.1     | 1.9     | 2        |     |
| 1990 | 53.00  | 52.67  | 439.33 | 412.00 | 0.00   | 3.00   | 214.67 | 216.67 | 43.33  | 37.33  | 0.00   | 0.00   | 47569.00 | 47675.67 | 93.00  | 87.33  | 214.33 | 250.67 | 3.00  | 8.67  | 0.00  | 0.00  | 10.67  | 15.00  | 171.33 | 179.33 | 20.33  | 15.67  | 156.00 | 230.67 | 1.162     | 1.346     | 1.864     | 0.070     | 0.120     | 0.174      | 50.3    | 63.5   | 73.8   | 78.9    | 13.30 | 15.86 | 19.37 | 16.50 | 76.9    | 111.7   | 113.8    | 3.3     | 2       | 1.3     | 1.7      |     |
| 1991 | 59.67  | 55.14  | 366.00 | 433.29 | 0.00   | 1.00   | 158.33 | 121.29 | 75.00  | 71.29  | 0.00   | 5.14   | 47673.00 | 48116.43 | 94.67  | 92.14  | 196.00 | 219.43 | 6.33  | 3.71  | 1.67  | 1.43  | 25.67  | 18.43  | 155.67 | 310.86 | 18.33  | 19.86  | 135.67 | 153.71 | 0.712     | 1.589     | 1.252     | 0.044     | 0.141     | 0.118      | 54.4    | 59     | 79     | 77.7    | 8.87  | 16.46 | 19.51 | 15.36 | 55.6    | 105.9   |          | 77.2    | 2.7     | 2.1     | 1.7      | 1.8 |

|      |       |       |        |        |      |      |        |        |       |        |       |       |          |          |       |       |        |        |       |      |      |      |       |       |        |        |       |       |        |        |       |       |       |       |       |       |      |      |      |      |       |       |       |       |      |       |       |     |     |     |     |
|------|-------|-------|--------|--------|------|------|--------|--------|-------|--------|-------|-------|----------|----------|-------|-------|--------|--------|-------|------|------|------|-------|-------|--------|--------|-------|-------|--------|--------|-------|-------|-------|-------|-------|-------|------|------|------|------|-------|-------|-------|-------|------|-------|-------|-----|-----|-----|-----|
| 1986 | 54.17 | 45.93 | 380.67 | 625.14 | 0.00 | 0.36 | 200.67 | 165.43 | 71.00 | 90.86  | 6.50  | 5.00  | 47361.00 | 46855.79 | 70.83 | 78.93 | 209.83 | 287.64 | 4.50  | 1.71 | 2.50 | 0.86 | 19.00 | 7.57  | 178.50 | 317.29 | 12.83 | 19.93 | 162.00 | 142.14 | 0.553 | 0.476 | 0.779 | 0.030 | 0.043 | 0.070 | 59.7 | 63   | 68.2 | 78.2 | 8.63  | 14.99 | 19.86 | 15.47 | 31.6 | 49.3  | 45.3  | 2.3 | 1.8 | 2   | 1.9 |
| 1987 | 66.67 | 40.75 | 329.33 | 481.08 | 0.00 | 1.67 | 242.33 | 156.42 | 57.00 | 83.25  | 0.00  | 12.00 | 47206.00 | 47370.50 | 73.33 | 88.67 | 176.33 | 230.83 | 20.67 | 6.33 | 4.00 | 1.17 | 17.33 | 13.17 | 124.00 | 377.25 | 32.33 | 15.67 | 140.67 | 68.75  | 1.477 | 0.862 | 0.784 | 0.082 | 0.078 | 0.071 | 51.7 | 58.8 | 69.8 | 77.6 | 9.86  | 12.32 | 17.98 | 16.69 | 84.8 | 77.9  | 50    | 2.2 | 2.9 | 2.1 | 1.7 |
| 1988 | 44.50 | 43.40 | 339.17 | 412.60 | 0.00 | 1.50 | 167.67 | 144.20 | 66.50 | 65.30  | 0.00  | 9.40  | 47877.00 | 47519.00 | 72.83 | 77.30 | 181.67 | 206.30 | 10.67 | 2.70 | 6.17 | 0.90 | 27.67 | 14.30 | 158.00 | 309.40 | 8.33  | 26.40 | 136.17 | 83.90  | 0.934 | 3.208 | 1.421 | 0.054 | 0.288 | 0.130 | 55.2 | 64.2 | 77.8 | 80.1 | 8.46  | 13.21 | 16.12 | 15.18 | 50.4 | 194.9 | 75.3  | 2.9 | 3.2 | 2.1 | 1.7 |
| 1989 | 47.00 | 47.64 | 306.00 | 437.00 | 0.00 | 0.00 | 199.80 | 170.09 | 68.40 | 109.27 | 19.00 | 4.09  | 47668.60 | 47369.27 | 62.00 | 87.55 | 201.20 | 219.09 | 8.80  | 2.09 | 0.00 | 0.00 | 7.20  | 7.36  | 163.20 | 321.55 | 13.60 | 18.00 | 169.60 | 96.91  | 0.695 | 0.516 | 0.432 | 0.041 | 0.046 | 0.040 | 48.8 | 64.3 | 64.8 | 69   | 11.59 | 13.41 | 18.43 | 15.04 | 38.8 | 55.4  | 35.7  | 2.9 | 2.1 | 1.9 | 2   |
| 1990 | 50.33 | 40.17 | 372.33 | 399.67 | 0.00 | 0.00 | 269.33 | 137.50 | 74.33 | 88.67  | 0.00  | 1.00  | 47800.67 | 47489.50 | 68.67 | 77.17 | 255.00 | 234.17 | 2.67  | 4.17 | 0.00 | 0.00 | 21.33 | 17.00 | 181.00 | 366.83 | 19.33 | 16.83 | 178.00 | 114.50 | 1.162 | 1.346 | 1.864 | 0.070 | 0.120 | 0.174 | 50.3 | 63.5 | 73.8 | 78.9 | 13.30 | 15.86 | 19.37 | 16.50 | 76.9 | 111.7 | 113.8 | 3.3 | 2   | 1.3 | 1.7 |
| 1991 | 47.25 | 41.30 | 339.00 | 415.00 | 2.25 | 0.60 | 187.75 | 116.40 | 68.50 | 82.70  | 0.00  | 1.90  | 47783.25 | 47390.60 | 73.00 | 80.30 | 192.00 | 218.40 | 9.00  | 1.10 | 4.75 | 1.60 | 13.00 | 2.30  | 154.50 | 325.40 | 15.50 | 23.60 | 146.75 | 76.90  | 0.712 | 1.589 | 1.252 | 0.044 | 0.141 | 0.118 | 54.4 | 59   | 79   | 77.7 | 8.87  | 16.46 | 19.51 | 15.36 | 55.6 | 105.9 | 77.2  | 2.7 | 2.1 | 1.7 | 1.8 |

Pine #4

| Year | Al_lat | Al_ear | Ca_lat | Ca_ear | Cl_lat | Cl_ear | Cu_lat | Cu_ear | Fe_lat | Fe_ear | Hg_lat | Hg_ear | inc_lat  | inc_ear  | K_lat  | K_ear  | Mn_lat | Mn_ear | P_lat | P_ear | S_lat | S_ear | Si_lat | Si_ear | Sr_lat | Sr_ear | Ti_lat | Ti_ear | Zn_lat | Zn_ear | lv_jn_ind | lv_jl_ind | lv_au_ind | lv-Vys_jn | lv-Vys_jl | lv-Vys_aug | Hum_may | Hum_jn | Hum_jl | Hum_aug | T_may | T_jn  | T_jl  | T_aug | Prec_jn | Prec_jl | Prec_aug | Wind_my | Wind_jn | Wind_jl | Wind_aug |
|------|--------|--------|--------|--------|--------|--------|--------|--------|--------|--------|--------|--------|----------|----------|--------|--------|--------|--------|-------|-------|-------|-------|--------|--------|--------|--------|--------|--------|--------|--------|-----------|-----------|-----------|-----------|-----------|------------|---------|--------|--------|---------|-------|-------|-------|-------|---------|---------|----------|---------|---------|---------|----------|
| 1981 | 48.33  | 41.90  | 383.33 | 610.24 | 9.17   | 2.05   | 294.17 | 162.05 | 29.50  | 44.00  | 4.00   | 1.10   | 47673.17 | 47577.52 | 62.67  | 71.71  | 181.50 | 248.67 | 17.00 | 7.90  | 0.00  | 0.95  | 19.17  | 14.00  | 3.50   | 146.86 | 11.17  | 15.57  | 311.17 | 153.57 | 0.267     | 1.200     | 1.422     | 0.011     | 0.102     | 0.130      | 47.7    | 56.4   | 68.8   | 76.4    | 12.15 | 17.13 | 16.67 | 14.94 | 15.3    | 99      | 88.2     | 3.2     | 1.7     | 2.1     | 1        |
| 1982 | 53.50  | 45.83  | 423.25 | 557.28 | 2.13   | 2.22   | 241.63 | 182.56 | 31.00  | 38.89  | 2.75   | 3.22   | 47430.13 | 47645.94 | 66.75  | 74.06  | 193.63 | 226.33 | 13.25 | 4.56  | 4.25  | 3.28  | 24.63  | 15.78  | 18.00  | 160.00 | 21.00  | 11.11  | 295.25 | 166.89 | 0.403     | 0.954     | 0.550     | 0.018     | 0.083     | 0.050      | 53.2    | 56.3   | 72.5   | 70.6    | 10.00 | 17.06 | 17.21 | 15.34 | 24.5    | 72.8    | 42.9     | 2.3     | 2.1     | 1.8     | 2        |
| 1983 | 58.00  | 48.74  | 382.25 | 543.81 | 7.00   | 0.48   | 225.00 | 162.85 | 67.25  | 53.33  | 0.00   | 3.22   | 47722.50 | 47580.04 | 77.75  | 96.70  | 187.25 | 211.07 | 13.25 | 8.33  | 10.00 | 1.96  | 22.75  | 13.74  | 0.00   | 171.59 | 30.25  | 19.63  | 246.75 | 147.48 | 0.947     | 1.212     | 0.681     | 0.044     | 0.107     | 0.061      | 50.7    | 54.3   | 68.8   | 75.7    | 7.59  | 16.11 | 16.45 | 15.26 | 61.2    | 102.8   | 43.5     | 2.4     | 1.9     | 1.7     | 1.5      |
| 1984 | 69.50  | 45.94  | 331.50 | 505.47 | 0.00   | 2.35   | 199.50 | 164.65 | 16.00  | 60.24  | 0.00   | 2.76   | 47533.50 | 47531.00 | 68.00  | 96.82  | 170.50 | 206.35 | 14.00 | 5.35  | 13.00 | 2.29  | 20.00  | 11.59  | 0.00   | 148.35 | 0.00   | 16.35  | 307.00 | 153.65 | 0.833     | 1.059     | 0.549     | 0.041     | 0.094     | 0.049      | 60.6    | 64     | 75.9   | 72.1    | 8.51  | 15.90 | 16.98 | 15.50 | 44.3    | 72      | 40.7     | 2.2     | 1.8     | 1.4     | 1.6      |
| 1985 | 45.60  | 49.53  | 414.00 | 517.93 | 13.80  | 0.73   | 249.40 | 150.40 | 30.60  | 50.47  | 10.40  | 0.40   | 47539.00 | 47161.13 | 111.80 | 112.87 | 191.80 | 213.00 | 7.20  | 6.60  | 0.80  | 3.27  | 22.00  | 13.40  | 68.80  | 167.40 | 3.20   | 16.53  | 276.80 | 175.20 | 1.778     | 1.286     | 0.865     | 0.091     | 0.115     | 0.078      | 53.9    | 66.7   | 75.2   | 76.6    | 8.28  | 14.28 | 18.04 | 15.25 | 84.5    | 95.1    | 53.2     | 2.9     | 1.7     | 1.2     | 1.7      |
| 1986 | 60.00  | 47.00  | 336.00 | 475.77 | 9.00   | 4.62   | 233.25 | 146.92 | 35.50  | 62.77  | 0.00   | 0.00   | 47500.25 | 47363.15 | 68.25  | 92.62  | 171.75 | 190.77 | 16.75 | 11.46 | 6.00  | 3.23  | 29.00  | 16.69  | 32.25  | 175.92 | 9.50   | 15.15  | 248.75 | 156.54 | 0.553     | 0.476     | 0.779     | 0.030     | 0.043     | 0.070      | 59.7    | 63     | 68.2   | 78.2    | 8.63  | 14.99 | 19.86 | 15.47 | 31.6    | 49.3    | 45.3     | 2.3     | 1.8     | 2       | 1.9      |
| 1987 | 73.20  | 46.11  | 394.80 | 464.78 | 3.40   | 1.67   | 188.40 | 158.22 | 25.40  | 36.33  | 0.00   | 0.00   | 47607.80 | 47439.56 | 83.40  | 94.44  | 189.00 | 206.67 | 22.80 | 5.67  | 12.80 | 2.89  | 32.60  | 6.11   | 47.00  | 127.89 | 10.60  | 8.00   | 243.60 | 161.56 | 1.477     | 0.862     | 0.784     | 0.082     | 0.078     | 0.071      | 51.7    | 58.8   | 69.8   | 77.6    | 9.86  | 12.32 | 17.98 | 16.69 | 84.8    | 77.9    | 50       | 2.2     | 2.9     | 2.1     | 1.7      |
| 1988 | 57.60  | 58.50  | 360.20 | 439.13 | 1.80   | 5.38   | 237.60 | 160.13 | 24.00  | 35.38  | 2.00   | 21.13  | 47383.20 | 47751.63 | 77.60  | 73.75  | 179.20 | 206.75 | 7.40  | 6.75  | 2.00  | 5.50  | 20.80  | 18.50  | 36.60  | 139.25 | 3.60   | 9.88   | 276.60 | 143.13 | 0.934     | 3.208     | 1.421     | 0.054     | 0.288     | 0.130      | 55.2    | 64.2   | 77.8   | 80.1    | 8.46  | 13.21 | 16.12 | 15.18 | 50.4    | 194.9   | 75.3     | 2.9     | 3.2     | 2.1     | 1.7      |
| 1989 | 54.60  | 52.00  | 309.60 | 438.43 | 8.80   | 2.00   | 186.80 | 203.29 | 18.40  | 58.71  | 0.00   | 7.43   | 47640.60 | 47724.43 | 75.60  | 84.71  | 147.20 | 205.57 | 11.60 | 8.86  | 2.00  | 3.57  | 16.40  | 11.86  | 36.60  | 101.86 | 11.40  | 21.71  | 205.20 | 126.86 | 0.695     | 0.516     | 0.432     | 0.041     | 0.046     | 0.040      | 48.8    | 64.3   | 64.8   | 69      | 11.59 | 13.41 | 18.43 | 15.04 | 38.8    | 55.4    | 35.7     | 2.9     | 2.1     | 1.9     | 2        |
| 1990 | 61.00  | 49.20  | 413.67 | 423.80 | 2.33   | 5.80   | 174.67 | 216.60 | 37.00  | 41.60  | 0.00   | 0.00   | 47418.00 | 47324.20 | 88.00  | 97.20  | 204.33 | 204.40 | 8.67  | 15.00 | 0.00  | 3.20  | 18.00  | 25.40  | 31.33  | 173.80 | 15.00  | 2.80   | 247.67 | 212.20 | 1.162     | 1.346     | 1.864     | 0.070     | 0.120     | 0.174      | 50.3    | 63.5   | 73.8   | 78.9    | 13.30 | 15.86 | 19.37 | 16.50 | 76.9    | 111.7   | 113.8    | 3.3     | 2       | 1.3     | 1.7      |
| 1991 | 57.50  | 49.44  | 325.83 | 456.67 | 6.33   | 1.33   | 246.17 | 130.56 | 42.00  | 114.22 | 3.50   | 0.00   | 47568.67 | 47718.33 | 87.83  | 74.11  | 223.33 | 224.11 | 9.50  | 7.22  | 6.33  | 7.11  | 17.00  | 14.11  | 44.50  | 124.89 | 9.33   | 18.67  | 237.67 | 151.67 | 0.712     | 1.589     | 1.252     | 0.044     | 0.141     | 0.118      | 54.4    | 59     | 79     | 77.7    | 8.87  | 16.46 | 19.51 | 15.36 | 55.6    | 105.9   | 77.2     | 2.7     | 2.1     | 1.7     | 1.8      |

Pine #5

|      | Al_lat | Al_ear | Ca_lat | Ca_ear | Cl_lat | Cl_ear | Cu_lat | Cu_ear | Fe_lat | Fe_ear | Hg_lat | Hg_ear | inc_lat  | inc_ear  | K_lat  | K_ear  | Mn_lat | Mn_ear | P_lat | P_ear | S_lat | S_ear | Si_lat | Si_ear | Sr_lat | Sr_ear | Ti_lat | Ti_ear | Zn_lat | Zn_ear | lv_jn_ind | lv_jl_ind | lv_au_ind | lv-Vys_jn | lv-Vys_jl | lv-Vys_aug | Hum_may | Hum_jn | Hum_jl | Hum_aug | T_may | T_jn  | T_jl  | T_aug | Prec_jn | Prec_jl | Prec_aug | Wind_my | Wind_jn | Wind_jl | Wind_aug |
|------|--------|--------|--------|--------|--------|--------|--------|--------|--------|--------|--------|--------|----------|----------|--------|--------|--------|--------|-------|-------|-------|-------|--------|--------|--------|--------|--------|--------|--------|--------|-----------|-----------|-----------|-----------|-----------|------------|---------|--------|--------|---------|-------|-------|-------|-------|---------|---------|----------|---------|---------|---------|----------|
| 1981 | 57.60  | 41.06  | 438.00 | 561.26 | 2.40   | 0.47   | 308.80 | 190.91 | 37.20  | 64.26  | 18.40  | 12.03  | 46794.20 | 46999.29 | 62.40  | 70.32  | 149.60 | 193.97 | 11.80 | 3.59  | 10.00 | 1.12  | 22.20  | 9.65   | 17.80  | 270.41 | 14.00  | 13.24  | 307.40 | 83.85  | 0.267     | 1.200     | 1.422     | 0.011     | 0.102     | 0.130      | 47.7    | 56.4   | 68.8   | 76.4    | 12.15 | 17.13 | 16.67 | 14.94 | 15.3    | 99      | 88.2     | 3.2     | 1.7     | 2.1     | 1        |
| 1982 | 67.25  | 44.60  | 435.13 | 521.08 | 4.88   | 1.20   | 321.50 | 178.04 | 32.75  | 55.24  | 15.63  | 8.16   | 46795.50 | 47035.04 | 60.00  | 60.00  | 167.38 | 188.88 | 16.25 | 5.76  | 5.88  | 2.60  | 23.88  | 15.44  | 35.13  | 211.08 | 20.13  | 11.44  | 293.13 | 90.88  | 0.403     | 0.954     | 0.550     | 0.018     | 0.083     | 0.050      | 53.2    | 56.3   | 72.5   | 70.6    | 10.00 | 17.06 | 17.21 | 15.34 | 24.5    | 72.8    | 42.9     | 2.3     | 2.1     | 1.8     | 2        |
| 1983 | 45.67  | 46.44  | 473.00 | 523.47 | 0.00   | 0.00   | 370.67 | 161.88 | 37.00  | 61.56  | 25.00  | 18.97  | 46791.67 | 46969.85 | 66.33  | 64.50  | 173.00 | 190.94 | 22.67 | 3.85  | 1.67  | 1.74  | 26.33  | 8.91   | 71.33  | 235.06 | 5.00   | 13.65  | 325.67 | 85.91  | 0.947     | 1.212     | 0.681     | 0.044     | 0.107     | 0.061      | 50.7    | 54.3   | 68.8   | 75.7    | 7.59  | 16.11 | 16.45 | 15.26 | 61.2    | 102.8   | 43.5     | 2.4     | 1.9     | 1.7     | 1.5      |
| 1984 | 33.50  | 40.46  | 577.00 | 508.04 | 0.00   | 1.71   | 297.50 | 164.08 | 90.50  | 65.63  | 0.00   | 3.00   | 46449.00 | 46997.83 | 74.00  | 65.21  | 209.50 | 186.00 | 15.50 | 4.29  | 0.00  | 2.25  | 14.00  | 6.88   | 114.50 | 245.58 | 12.00  | 15.71  | 175.50 | 76.13  | 0.833     | 1.059     | 0.549     | 0.041     | 0.094     | 0.049      | 60.6    | 64     | 75.9   | 72.1    | 8.51  | 15.90 | 16.98 | 15.50 | 44.3    | 72      | 40.7     | 2.2     | 1.8     | 1.4     | 1.6      |
| 1985 | 59.00  | 42.46  | 508.33 | 471.04 | 0.00   | 0.23   | 376.00 | 151.54 | 21.33  | 62.77  | 0.00   | 10.81  | 46528.33 | 46726.96 | 95.67  | 74.65  | 222.33 | 184.88 | 10.67 | 4.58  | 0.00  | 1.04  | 12.00  | 9.23   | 53.00  | 230.88 | 14.00  | 16.35  | 255.33 | 91.46  | 1.778     | 1.286     | 0.865     | 0.091     | 0.115     | 0.078      | 53.9    | 66.7   | 75.2   | 76.6    | 8.28  | 14.28 | 18.04 | 15.25 | 84.5    | 95.1    | 53.2     | 2.9     | 1.7     | 1.2     | 1.7      |
| 1986 | 61.17  | 35.31  | 396.50 | 489.06 | 1.33   | 0.00   | 229.00 | 97.00  | 26.67  | 57.69  | 0.00   | 15.06  | 46898.33 | 46721.00 | 103.83 | 91.69  | 188.33 | 194.25 | 16.50 | 2.38  | 5.17  | 0.88  | 25.00  | 6.19   | 46.50  | 325.88 | 15.83  | 18.50  | 235.50 | 71.25  | 0.553     | 0.476     | 0.779     | 0.030     | 0.043     | 0.070      | 59.7    | 63     | 68.2   | 78.2    | 8.63  | 14.99 | 19.86 | 15.47 | 31.6    | 49.3    | 45.3     | 2.3     | 1.8     | 2       | 1.9      |
| 1987 | 48.67  | 40.54  | 476.33 | 428.46 | 1.33   | 0.77   | 257.00 | 148.77 | 62.33  | 58.46  | 0.00   | 14.92  | 46433.33 | 46560.77 | 145.00 | 126.00 | 201.67 | 187.77 | 4.33  | 4.69  | 8.33  | 1.08  | 17.00  | 6.62   | 112.00 | 224.38 | 13.00  | 15.38  | 187.67 | 115.62 | 1.477     | 0.862     | 0.784     | 0.082     | 0.078     | 0.071      | 51.7    | 58.8   | 69.8   | 77.6    | 9.86  | 12.32 | 17.98 | 16.69 | 84.8    | 77.9    | 50       | 2.2     | 2.9     | 2.1     | 1.7      |
| 1988 | 68.50  | 47.55  | 384.50 | 394.55 | 0.00   | 1.27   | 340.00 | 173.09 | 66.50  | 50.45  | 0.00   | 14.82  | 46758.00 | 46736.36 | 135.00 | 122.45 | 159.00 | 185.55 | 9.00  | 7.73  | 7.00  | 1.64  | 14.00  | 8.18   | 43.00  | 216.55 | 25.50  | 14.91  | 290.00 | 86.91  | 0.934     | 3.208     | 1.421     | 0.054     | 0.288     | 0.130      | 55.2    | 64.2   | 77.8   | 80.1    | 8.46  | 13.21 | 16.12 | 15.18 | 50.4    | 194.9   | 75.3     | 2.9     | 3.2     | 2.1     | 1.7      |
| 1989 | 55.00  | 45.15  | 328.50 | 381.92 | 0.00   | 1.15   | 302.50 | 173.85 | 12.00  | 60.77  | 0.00   | 16.92  | 46725.00 | 46769.77 | 125.50 | 122.31 | 166.50 | 167.54 | 10.00 | 5.77  | 23.00 | 0.77  | 6.00   | 9.62   | 42.50  | 262.85 | 21.00  | 13.08  | 325.00 | 91.62  | 0.695     | 0.516     | 0.432     | 0.041     | 0.046     | 0.040      | 48.8    | 64.3   | 64.8   | 69      | 11.59 | 13.41 | 18.43 | 15.04 | 38.8    | 55.4    | 35.7     | 2.9     | 2.1     | 1.9     | 2        |
| 1990 | 63.00  | 53.33  | 431.00 | 363.67 | 0.00   | 1.17   | 364.00 | 115.50 | 26.00  | 54.33  | 0.00   | 8.83   | 46638.50 | 47015.17 | 194.50 | 119.83 | 208.00 | 178.17 | 5.50  | 3.83  | 13.00 | 0.00  | 23.50  | 14.50  | 0.00   | 353.00 | 95.50  | 11.17  | 353.00 | 95.50  | 1.162     | 1.346     | 1.864     | 0.070     | 0.120     | 0.174      | 50.3    | 63.5   | 73.8   | 78.9    | 13.30 | 15.86 | 19.37 | 16.50 | 76.9    | 111.7   | 113.8    | 3.3     | 2       | 1.3     | 1.7      |
| 1991 | 57     | 41.25  | 280.6  | 371.25 | 4.8    | 1.08   | 267.20 | 120.67 | 34.00  | 53.33  | 3.40   | 24.83  | 47248.60 | 46979.83 | 89.40  | 120.42 | 163.60 | 176.17 | 5.80  | 4.00  | 6.40  | 1.00  | 23.60  | 7.83   | 26.20  | 299.58 | 16.60  | 10.67  | 241.40 | 57.33  | 0.712     | 1.589     | 1.252     | 0.044     | 0.141     | 0.118      | 54.4    | 59     | 79     | 77.7    | 8.87  | 16.46 | 19.51 | 15.36 | 55.6    | 105.9   | 77.2     | 2.7     | 2.1     | 1.7     | 1.8      |

|      |       |       |        |        |      |      |        |        |        |        |       |       |          |          |       |       |        |        |       |      |      |      |       |       |        |        |       |       |        |        |       |       |       |       |       |       |      |      |      |      |       |       |       |       |      |       |       |     |     |     |     |
|------|-------|-------|--------|--------|------|------|--------|--------|--------|--------|-------|-------|----------|----------|-------|-------|--------|--------|-------|------|------|------|-------|-------|--------|--------|-------|-------|--------|--------|-------|-------|-------|-------|-------|-------|------|------|------|------|-------|-------|-------|-------|------|-------|-------|-----|-----|-----|-----|
| 1985 | 50.40 | 43.14 | 419.60 | 575.90 | 3.60 | 0.48 | 191.80 | 139.24 | 108.40 | 104.52 | 8.80  | 15.93 | 47116.00 | 46569.41 | 91.00 | 97.03 | 205.00 | 246.28 | 10.40 | 4.10 | 2.20 | 3.03 | 22.60 | 12.17 | 114.20 | 289.90 | 12.00 | 16.69 | 198.00 | 123.59 | 1.778 | 1.286 | 0.865 | 0.091 | 0.115 | 0.078 | 53.9 | 66.7 | 75.2 | 76.6 | 8.28  | 14.28 | 18.04 | 15.25 | 84.5 | 95.1  | 53.2  | 2.9 | 1.7 | 1.2 | 1.7 |
| 1986 | 41.67 | 44.58 | 372.33 | 528.75 | 8.50 | 0.46 | 220.83 | 156.46 | 66.00  | 92.54  | 0.00  | 24.46 | 47179.83 | 46503.71 | 80.17 | 86.63 | 221.00 | 240.42 | 6.17  | 3.46 | 4.33 | 0.88 | 25.83 | 8.21  | 106.67 | 291.92 | 7.50  | 17.50 | 250.33 | 120.17 | 0.553 | 0.476 | 0.779 | 0.030 | 0.043 | 0.070 | 59.7 | 63   | 68.2 | 78.2 | 8.63  | 14.99 | 19.86 | 15.47 | 31.6 | 49.3  | 45.3  | 2.3 | 1.8 | 2   | 1.9 |
| 1987 | 38.33 | 37.00 | 403.33 | 551.41 | 0.00 | 0.68 | 170.33 | 136.41 | 37.67  | 97.91  | 0.00  | 6.77  | 47296.00 | 46637.82 | 72.00 | 89.32 | 235.67 | 234.73 | 3.33  | 5.86 | 7.67 | 1.18 | 22.33 | 13.32 | 171.67 | 272.95 | 14.33 | 14.82 | 187.00 | 106.50 | 1.477 | 0.862 | 0.784 | 0.082 | 0.078 | 0.071 | 51.7 | 58.8 | 69.8 | 77.6 | 9.86  | 12.32 | 17.98 | 16.69 | 84.8 | 77.9  | 50    | 2.2 | 2.9 | 2.1 | 1.7 |
| 1988 | 52.17 | 42.09 | 348.50 | 500.27 | 2.67 | 0.68 | 181.50 | 147.45 | 65.33  | 102.27 | 2.17  | 15.95 | 47131.00 | 46718.59 | 77.83 | 89.73 | 201.50 | 232.23 | 8.50  | 5.91 | 1.67 | 3.14 | 21.50 | 12.27 | 183.50 | 230.95 | 9.17  | 28.77 | 190.00 | 152.23 | 0.934 | 3.208 | 1.421 | 0.054 | 0.288 | 0.130 | 55.2 | 64.2 | 77.8 | 80.1 | 8.46  | 13.21 | 16.12 | 15.18 | 50.4 | 194.9 | 75.3  | 2.9 | 3.2 | 2.1 | 1.7 |
| 1989 | 58.17 | 42.60 | 347.50 | 495.40 | 1.67 | 0.55 | 248.83 | 133.20 | 54.33  | 103.20 | 11.17 | 8.95  | 46943.33 | 46702.45 | 61.67 | 71.50 | 188.33 | 225.20 | 9.50  | 4.70 | 7.50 | 3.10 | 15.83 | 13.00 | 122.00 | 282.45 | 16.00 | 13.75 | 205.50 | 124.10 | 0.695 | 0.516 | 0.432 | 0.041 | 0.046 | 0.040 | 48.8 | 64.3 | 64.8 | 69   | 11.59 | 13.41 | 18.43 | 15.04 | 38.8 | 55.4  | 35.7  | 2.9 | 2.1 | 1.9 | 2   |
| 1990 | 56.33 | 45.85 | 360.67 | 501.85 | 4.67 | 0.00 | 200.00 | 166.31 | 78.00  | 78.92  | 26.67 | 18.69 | 46620.00 | 46749.38 | 46.33 | 78.31 | 240.67 | 220.38 | 17.00 | 6.31 | 0.00 | 2.31 | 27.67 | 12.00 | 140.33 | 214.00 | 20.67 | 19.54 | 261.67 | 136.46 | 1.162 | 1.346 | 1.864 | 0.070 | 0.120 | 0.174 | 50.3 | 63.5 | 73.8 | 78.9 | 13.30 | 15.86 | 19.37 | 16.50 | 76.9 | 111.7 | 113.8 | 3.3 | 2   | 1.3 | 1.7 |
| 1991 | 58.29 | 49.05 | 314.00 | 476.89 | 3.57 | 1.21 | 223.57 | 150.84 | 72.14  | 76.53  | 26.86 | 14.21 | 46783.71 | 46533.11 | 58.57 | 57.89 | 185.14 | 222.84 | 11.57 | 6.05 | 7.29 | 1.89 | 19.71 | 12.47 | 78.14  | 226.32 | 19.00 | 24.11 | 266.14 | 147.79 | 0.712 | 1.589 | 1.252 | 0.044 | 0.141 | 0.118 | 54.4 | 59   | 79   | 77.7 | 8.87  | 16.46 | 19.51 | 15.36 | 55.6 | 105.9 | 77.2  | 2.7 | 2.1 | 1.7 | 1.8 |

South

Pine #1

| Year | Al_lat | Al_ear | Ca_lat | Ca_ear | Cl_lat | Cl_ear | Cu_lat | Cu_ear | Fe_lat | Fe_ear | Hg_lat | Hg_ear | inc_lat  | inc_ear  | K_lat  | K_ear  | Mn_lat | Mn_ear | P_lat | P_ear | S_lat | S_ear | Si_lat | Si_ear | Sr_lat | Sr_ear | Ti_lat | Ti_ear | Zn_lat | Zn_ear | lv_jn_ind | lv_jl_ind | lv_au_ind | lv-Vys_jn | lv-Vys_jl | lv-Vys_aug | Hum_may | Hum_jn | Hum_jl | Hum_aug | T_may | T_jn  | T_jl  | T_aug | Prec_jn | Prec_jl | Prec_aug | Wind_my | Wind_jn | Wind_jl | Wind_aug |
|------|--------|--------|--------|--------|--------|--------|--------|--------|--------|--------|--------|--------|----------|----------|--------|--------|--------|--------|-------|-------|-------|-------|--------|--------|--------|--------|--------|--------|--------|--------|-----------|-----------|-----------|-----------|-----------|------------|---------|--------|--------|---------|-------|-------|-------|-------|---------|---------|----------|---------|---------|---------|----------|
| 1981 | 52.67  | 44.76  | 513.11 | 606.76 | 0.00   | 1.14   | 196.33 | 161.57 | 67.44  | 72.14  | 18.22  | 13.71  | 47089.22 | 46657.62 | 71.11  | 71.33  | 363.67 | 370.86 | 7.89  | 3.52  | 2.33  | 0.86  | 17.00  | 16.43  | 218.89 | 249.10 | 20.11  | 17.48  | 206.89 | 152.90 | 0.267     | 1.200     | 1.422     | 0.011     | 0.102     | 0.130      | 47.7    | 56.4   | 68.8   | 76.4    | 12.15 | 17.13 | 16.67 | 14.94 | 15.3    | 99      | 88.2     | 3.2     | 1.7     | 2.1     | 1        |
| 1982 | 54.57  | 42.25  | 499.43 | 581.69 | 2.43   | 1.81   | 230.29 | 157.75 | 67.43  | 74.31  | 4.00   | 4.75   | 46831.43 | 46840.00 | 77.00  | 75.06  | 324.71 | 369.25 | 11.71 | 8.06  | 5.00  | 0.38  | 17.86  | 12.13  | 94.29  | 191.31 | 10.57  | 15.13  | 244.29 | 124.13 | 0.403     | 0.954     | 0.550     | 0.018     | 0.083     | 0.050      | 53.2    | 56.3   | 72.5   | 70.6    | 10.00 | 17.06 | 17.21 | 15.34 | 24.5    | 72.8    | 42.9     | 2.3     | 2.1     | 1.8     | 2        |
| 1983 | 58.20  | 40.60  | 486.20 | 566.90 | 8.40   | 0.35   | 264.80 | 130.40 | 54.00  | 80.40  | 8.00   | 13.20  | 46644.40 | 46828.30 | 100.40 | 99.10  | 356.80 | 344.85 | 15.20 | 6.95  | 3.00  | 1.30  | 21.80  | 10.65  | 120.00 | 263.60 | 15.40  | 15.05  | 208.60 | 136.35 | 0.947     | 1.212     | 0.681     | 0.044     | 0.107     | 0.061      | 50.7    | 54.3   | 68.8   | 75.7    | 7.59  | 16.11 | 16.45 | 15.26 | 61.2    | 102.8   | 43.5     | 2.4     | 1.9     | 1.7     | 1.5      |
| 1984 | 73.50  | 46.18  | 506.00 | 522.27 | 5.50   | 1.27   | 256.50 | 120.45 | 82.50  | 99.64  | 0.00   | 4.82   | 46383.00 | 46799.18 | 127.50 | 100.36 | 278.50 | 313.64 | 4.00  | 4.82  | 3.00  | 0.91  | 15.50  | 14.27  | 179.50 | 279.55 | 52.00  | 25.27  | 225.50 | 126.73 | 0.833     | 1.059     | 0.549     | 0.041     | 0.094     | 0.049      | 60.6    | 64     | 75.9   | 72.1    | 8.51  | 15.90 | 16.98 | 15.50 | 44.3    | 72      | 40.7     | 2.2     | 1.8     | 1.4     | 1.6      |
| 1985 | 52.75  | 49.36  | 503.25 | 529.82 | 3.50   | 1.18   | 271.25 | 186.55 | 65.00  | 103.73 | 0.00   | 17.73  | 46670.25 | 46843.45 | 112.75 | 109.73 | 311.25 | 321.91 | 3.00  | 1.73  | 13.25 | 5.73  | 11.25  | 16.73  | 76.75  | 236.55 | 11.50  | 18.82  | 273.50 | 149.18 | 1.778     | 1.286     | 0.865     | 0.091     | 0.115     | 0.078      | 53.9    | 66.7   | 75.2   | 76.6    | 8.28  | 14.28 | 18.04 | 15.25 | 84.5    | 95.1    | 53.2     | 2.9     | 1.7     | 1.2     | 1.7      |
| 1986 | 55.00  | 41.00  | 499.50 | 526.75 | 7.00   | 1.25   | 195.50 | 196.63 | 85.50  | 85.13  | 0.00   | 3.63   | 46651.00 | 46729.25 | 99.50  | 99.88  | 292.00 | 293.25 | 19.50 | 2.63  | 0.00  | 0.00  | 23.50  | 6.25   | 274.00 | 278.75 | 30.00  | 8.75   | 119.50 | 173.75 | 0.553     | 0.476     | 0.779     | 0.030     | 0.043     | 0.070      | 59.7    | 63     | 68.2   | 78.2    | 8.63  | 14.99 | 19.86 | 15.47 | 31.6    | 49.3    | 45.3     | 2.3     | 1.8     | 2       | 1.9      |
| 1987 | 68.33  | 55.40  | 496.67 | 520.60 | 9.67   | 15.20  | 198.00 | 215.40 | 70.67  | 67.40  | 0.00   | 0.00   | 47026.67 | 46943.00 | 102.33 | 108.60 | 342.33 | 340.60 | 6.00  | 19.60 | 4.33  | 6.00  | 19.67  | 23.20  | 159.67 | 183.80 | 17.67  | 10.00  | 258.00 | 165.40 | 1.477     | 0.862     | 0.784     | 0.082     | 0.078     | 0.071      | 51.7    | 58.8   | 69.8   | 77.6    | 9.86  | 12.32 | 17.98 | 16.69 | 84.8    | 77.9    | 50       | 2.2     | 2.9     | 2.1     | 1.7      |
| 1988 | 40.50  | 50.00  | 410.50 | 496.14 | 11.50  | 1.57   | 215.00 | 213.57 | 60.50  | 57.00  | 0.00   | 12.29  | 47580.50 | 47162.86 | 109.50 | 106.43 | 272.50 | 306.71 | 6.00  | 5.29  | 0.00  | 2.71  | 14.00  | 19.29  | 280.50 | 161.43 | 18.00  | 22.71  | 212.00 | 234.14 | 0.934     | 3.208     | 1.421     | 0.054     | 0.288     | 0.130      | 55.2    | 64.2   | 77.8   | 80.1    | 8.46  | 13.21 | 16.12 | 15.18 | 50.4    | 194.9   | 75.3     | 2.9     | 3.2     | 2.1     | 1.7      |
| 1989 | 43.00  | 42.00  | 483.00 | 416.33 | 13.00  | 18.00  | 235.00 | 194.67 | 69.00  | 59.67  | 0.00   | 16.00  | 47131.00 | 46941.67 | 100.00 | 98.00  | 282.00 | 268.33 | 0.00  | 4.00  | 0.00  | 6.00  | 21.00  | 9.00   | 0.00   | 126.67 | 49.00  | 4.00   | 299.00 | 150.67 | 0.695     | 0.516     | 0.432     | 0.041     | 0.046     | 0.040      | 48.8    | 64.3   | 64.8   | 69      | 11.59 | 13.41 | 18.43 | 15.04 | 38.8    | 55.4    | 35.7     | 2.9     | 2.1     | 1.9     | 2        |
| 1990 | 47.50  | 50.00  | 532.50 | 520.50 | 0.00   | 0.00   | 212.50 | 196.00 | 86.00  | 34.00  | 0.00   | 0.00   | 46277.50 | 46579.50 | 97.50  | 122.00 | 343.50 | 331.50 | 0.00  | 14.00 | 0.00  | 0.00  | 6.50   | 7.50   | 314.00 | 93.50  | 29.50  | 14.00  | 201.50 | 259.50 | 1.162     | 1.346     | 1.864     | 0.070     | 0.120     | 0.174      | 50.3    | 63.5   | 73.8   | 78.9    | 13.30 | 15.86 | 19.37 | 16.50 | 76.9    | 111.7   | 113.8    | 3.3     | 2       | 1.3     | 1.7      |
| 1991 | 42.00  | 44.67  | 425.00 | 482.17 | 6.75   | 2.50   | 217.50 | 199.83 | 81.25  | 65.50  | 7.00   | 8.17   | 46849.25 | 46817.67 | 101.50 | 108.83 | 269.75 | 299.50 | 8.00  | 6.17  | 1.75  | 1.00  | 8.25   | 16.50  | 361.50 | 258.33 | 29.50  | 13.67  | 259.50 | 179.83 | 0.712     | 1.589     | 1.252     | 0.044     | 0.141     | 0.118      | 54.4    | 59     | 79     | 77.7    | 8.87  | 16.46 | 19.51 | 15.36 | 55.6    | 105.9   | 77.2     | 2.7     | 2.1     | 1.7     | 1.8      |

Pine #2

|      | Al_lat | Al_ear | Ca_lat | Ca_ear | Cl_lat | Cl_ear | Cu_lat | Cu_ear | Fe_lat | Fe_ear | Hg_lat | Hg_ear | inc_lat  | inc_ear  | K_lat  | K_ear  | Mn_lat | Mn_ear | P_lat | P_ear | S_lat | S_ear | Si_lat | Si_ear | Sr_lat | Sr_ear | Ti_lat | Ti_ear | Zn_lat | Zn_ear | lv_jn_ind | lv_jl_ind | lv_au_ind | lv-Vys_jn | lv-Vys_jl | lv-Vys_aug | Hum_may | Hum_jn | Hum_jl | Hum_aug | T_may | T_jn  | T_jl  | T_aug | Prec_jn | Prec_jl | Prec_aug | Wind_my | Wind_jn | Wind_jl | Wind_aug |
|------|--------|--------|--------|--------|--------|--------|--------|--------|--------|--------|--------|--------|----------|----------|--------|--------|--------|--------|-------|-------|-------|-------|--------|--------|--------|--------|--------|--------|--------|--------|-----------|-----------|-----------|-----------|-----------|------------|---------|--------|--------|---------|-------|-------|-------|-------|---------|---------|----------|---------|---------|---------|----------|
| 1981 | 58.71  | 55.33  | 428.29 | 484.53 | 1.57   | 0.00   | 208.00 | 136.80 | 42.14  | 59.47  | 4.14   | 15.67  | 47315.00 | 47544.87 | 48.14  | 53.67  | 223.00 | 248.67 | 16.00 | 4.60  | 2.00  | 0.67  | 13.86  | 5.67   | 155.71 | 298.73 | 15.43  | 17.87  | 310.43 | 195.33 | 0.267     | 1.200     | 1.422     | 0.011     | 0.102     | 0.130      | 47.7    | 56.4   | 68.8   | 76.4    | 12.15 | 17.13 | 16.67 | 14.94 | 15.3    | 99      | 88.2     | 3.2     | 1.7     | 2.1     | 1        |
| 1982 | 51.89  | 44.91  | 395.00 | 451.18 | 0.00   | 2.00   | 241.33 | 178.55 | 53.44  | 50.73  | 4.67   | 8.09   | 46945.11 | 47832.09 | 39.89  | 46.09  | 222.67 | 239.18 | 13.67 | 2.73  | 3.22  | 0.91  | 20.89  | 10.27  | 68.78  | 186.64 | 6.89   | 15.45  | 312.22 | 237.36 | 0.403     | 0.954     | 0.550     | 0.018     | 0.083     | 0.050      | 53.2    | 56.3   | 72.5   | 70.6    | 10.00 | 17.06 | 17.21 | 15.34 | 24.5    | 72.8    | 42.9     | 2.3     | 2.1     | 1.8     | 2        |
| 1983 | 47.00  | 50.00  | 405.25 | 436.40 | 0.00   | 0.00   | 267.50 | 144.90 | 50.25  | 49.95  | 13.25  | 10.55  | 47290.75 | 47398.70 | 51.50  | 55.65  | 224.75 | 225.80 | 0.00  | 7.85  | 0.00  | 1.70  | 20.00  | 12.00  | 89.25  | 223.40 | 13.00  | 16.60  | 351.75 | 199.35 | 0.947     | 1.212     | 0.681     | 0.044     | 0.107     | 0.061      | 50.7    | 54.3   | 68.8   | 75.7    | 7.59  | 16.11 | 16.45 | 15.26 | 61.2    | 102.8   | 43.5     | 2.4     | 1.9     | 1.7     | 1.5      |
| 1984 | 59.00  | 55.77  | 408.00 | 419.31 | 0.00   | 0.00   | 196.00 | 142.62 | 27.50  | 56.62  | 0.00   | 8.08   | 46738.00 | 47377.08 | 65.50  | 48.23  | 223.50 | 207.54 | 9.00  | 9.23  | 3.50  | 1.00  | 24.00  | 12.77  | 47.00  | 260.08 | 10.50  | 11.15  | 273.00 | 209.08 | 0.833     | 1.059     | 0.549     | 0.041     | 0.094     | 0.049      | 60.6    | 64     | 75.9   | 72.1    | 8.51  | 15.90 | 16.98 | 15.50 | 44.3    | 72      | 40.7     | 2.2     | 1.8     | 1.4     | 1.6      |
| 1985 | 47.00  | 54.21  | 378.67 | 408.00 | 0.00   | 0.36   | 228.33 | 172.64 | 48.00  | 67.00  | 0.00   | 0.71   | 47089.33 | 47394.43 | 53.67  | 51.07  | 214.67 | 206.07 | 5.67  | 3.50  | 13.33 | 3.43  | 24.33  | 17.86  | 141.67 | 244.21 | 13.33  | 18.79  | 326.00 | 209.57 | 1.778     | 1.286     | 0.865     | 0.091     | 0.115     | 0.078      | 53.9    | 66.7   | 75.2   | 76.6    | 8.28  | 14.28 | 18.04 | 15.25 | 84.5    | 95.1    | 53.2     | 2.9     | 1.7     | 1.2     | 1.7      |
| 1986 | 48.33  | 52.67  | 385.67 | 388.50 | 0.00   | 0.58   | 215.33 | 139.42 | 49.33  | 45.17  | 0.00   | 5.58   | 46876.67 | 47532.75 | 46.00  | 56.83  | 174.00 | 205.25 | 6.67  | 3.08  | 4.33  | 2.17  | 25.67  | 6.83   | 24.00  | 260.75 | 0.00   | 17.00  | 375.33 | 200.83 | 0.553     | 0.476     | 0.779     | 0.030     | 0.043     | 0.070      | 59.7    | 63     | 68.2   | 78.2    | 8.63  | 14.99 | 19.86 | 15.47 | 31.6    | 49.3    | 45.3     | 2.3     | 1.8     | 2       | 1.9      |
| 1987 | 58.00  | 46.60  | 328.00 | 374.40 | 8.00   | 0.00   | 268.00 | 140.30 | 31.67  | 61.70  | 0.00   | 4.40   | 46963.33 | 47441.70 | 72.33  | 52.60  | 207.67 | 198.40 | 12.33 | 2.70  | 13.33 | 0.60  | 28.67  | 11.00  | 31.00  | 293.10 | 17.00  | 18.50  | 391.33 | 277.30 | 1.477     | 0.862     | 0.784     | 0.082     | 0.078     | 0.071      | 51.7    | 58.8   | 69.8   | 77.6    | 9.86  | 12.32 | 17.98 | 16.69 | 84.8    | 77.9    | 50       | 2.2     | 2.9     | 2.1     | 1.7      |
| 1988 | 67.40  | 55.50  | 383.40 | 373.50 | 0.00   | 0.00   | 290.40 | 151.40 | 44.40  | 52.40  | 3.00   | 1.70   | 47051.40 | 47440.50 | 63.40  | 65.70  | 200.60 | 200.80 | 13.20 | 7.50  | 1.00  | 0.00  | 12.00  | 12.40  | 106.00 | 246.60 | 21.60  | 14.30  | 343.20 | 230.00 | 0.934     | 3.208     | 1.421     | 0.054     | 0.288     | 0.130      | 55.2    | 64.2   | 77.8   | 80.1    | 8.46  | 13.21 | 16.12 | 15.18 | 50.4    | 194.9   | 75.3     | 2.9     | 3.2     | 2.1     | 1.7      |
| 1989 | 58.00  | 52.00  | 377.50 | 353.33 | 0.00   | 0.00   | 236.50 | 193.00 | 31.00  | 49.67  | 16.00  | 14.22  | 46969.50 | 47372.44 | 78.75  | 78.56  | 195.75 | 182.00 | 4.50  | 7.89  | 0.00  | 3.89  | 28.00  | 15.89  | 20.00  | 155.78 | 13.75  | 10.89  | 343.25 | 280.44 | 0.695     | 0.516     | 0.432     | 0.041     | 0.046     | 0.040      | 48.8    | 64.3   | 64.8   | 69      | 11.59 | 13.41 | 18.43 | 15.04 | 38.8    | 55.4    | 35.7     | 2.9     | 2.1     | 1.9     | 2        |
| 1990 | 58.67  | 53.60  | 472.67 | 443.60 | 6.33   | 0.00   | 180.67 | 161.80 | 65.67  | 50.40  | 5.67   | 44.60  | 47264.00 | 47266.80 | 113.33 | 102.20 | 253.67 | 212.00 | 11.67 | 8.40  | 8.00  | 6.80  | 23.00  | 18.60  | 183.33 | 161.80 | 9.33   | 10.80  | 303.00 | 262.40 | 1.162     | 1.346     | 1.864     | 0.070     | 0.120     | 0.174      | 50.3    | 63.5   | 73.8   | 78.9    | 13.30 | 15.86 | 19.37 | 16.50 | 76.9    | 111.7   | 113.8    | 3.3     | 2       | 1.3     | 1.7      |
| 1991 | 57.00  | 55.09  | 418.00 | 362.18 | 0.00   | 0.00   | 202.67 | 168.82 | 62.00  | 68.73  | 0.00   | 6.18   | 47152.00 | 47299.09 | 109.00 | 77.73  | 189.67 | 193.18 | 11.00 | 9.45  | 2.67  | 2.64  | 29.00  | 17.45  | 98.67  | 196.64 | 17.00  | 29.18  | 260.33 | 221.00 | 0.712     | 1.589     | 1.252     | 0.044     | 0.141     | 0.118      | 54.4    | 59     | 79     | 77.7    | 8.87  | 16.46 | 19.51 | 15.36 | 55.6    | 105.9   | 77.2     | 2.7     | 2.1     | 1.7     | 1.8      |

|      |       |       |        |        |      |      |        |        |        |        |       |       |          |          |        |       |        |        |       |      |       |      |       |       |        |        |       |       |        |        |       |       |       |       |       |       |      |      |      |      |       |       |       |       |      |       |       |     |     |     |     |
|------|-------|-------|--------|--------|------|------|--------|--------|--------|--------|-------|-------|----------|----------|--------|-------|--------|--------|-------|------|-------|------|-------|-------|--------|--------|-------|-------|--------|--------|-------|-------|-------|-------|-------|-------|------|------|------|------|-------|-------|-------|-------|------|-------|-------|-----|-----|-----|-----|
| 1982 | 52.22 | 39.38 | 456.44 | 625.05 | 1.67 | 0.00 | 258.78 | 178.71 | 59.22  | 80.48  | 0.00  | 6.10  | 46895.11 | 46595.38 | 73.11  | 67.43 | 252.56 | 297.33 | 11.11 | 3.86 | 11.67 | 3.95 | 18.44 | 9.67  | 46.78  | 295.19 | 8.22  | 16.10 | 265.00 | 110.48 | 0.403 | 0.954 | 0.550 | 0.018 | 0.083 | 0.050 | 53.2 | 56.3 | 72.5 | 70.6 | 10.00 | 17.06 | 17.21 | 15.34 | 24.5 | 72.8  | 42.9  | 2.3 | 2.1 | 1.8 | 2   |
| 1983 | 55.33 | 40.76 | 474.00 | 588.31 | 3.00 | 0.00 | 308.67 | 175.17 | 82.00  | 94.10  | 22.33 | 9.55  | 46838.33 | 46612.21 | 64.33  | 68.59 | 288.67 | 274.48 | 16.67 | 2.97 | 6.33  | 1.03 | 22.33 | 9.69  | 113.00 | 315.97 | 29.33 | 12.66 | 235.67 | 107.03 | 0.947 | 1.212 | 0.681 | 0.044 | 0.107 | 0.061 | 50.7 | 54.3 | 68.8 | 75.7 | 7.59  | 16.11 | 16.45 | 15.26 | 61.2 | 102.8 | 43.5  | 2.4 | 1.9 | 1.7 | 1.5 |
| 1984 | 40.25 | 34.94 | 425.75 | 599.44 | 0.00 | 0.00 | 220.75 | 152.44 | 71.00  | 96.94  | 0.00  | 6.31  | 46566.50 | 46348.75 | 48.25  | 74.06 | 263.25 | 267.69 | 5.75  | 2.56 | 0.00  | 0.00 | 5.25  | 8.94  | 125.25 | 271.31 | 13.75 | 15.56 | 215.50 | 138.56 | 0.833 | 1.059 | 0.549 | 0.041 | 0.094 | 0.049 | 60.6 | 64   | 75.9 | 72.1 | 8.51  | 15.90 | 16.98 | 15.50 | 44.3 | 72    | 40.7  | 2.2 | 1.8 | 1.4 | 1.6 |
| 1985 | 39.40 | 35.22 | 439.60 | 545.28 | 0.00 | 0.44 | 215.40 | 157.83 | 83.00  | 88.83  | 0.00  | 15.56 | 46800.00 | 46412.39 | 63.40  | 69.17 | 253.60 | 260.22 | 4.40  | 3.22 | 3.20  | 0.56 | 20.00 | 3.50  | 130.20 | 322.56 | 19.80 | 17.67 | 216.80 | 95.17  | 1.778 | 1.286 | 0.865 | 0.091 | 0.115 | 0.078 | 53.9 | 66.7 | 75.2 | 76.6 | 8.28  | 14.28 | 18.04 | 15.25 | 84.5 | 95.1  | 53.2  | 2.9 | 1.7 | 1.2 | 1.7 |
| 1986 | 33.00 | 41.10 | 421.67 | 636.40 | 2.67 | 0.45 | 271.33 | 161.80 | 60.67  | 89.20  | 0.00  | 10.80 | 46848.67 | 46619.90 | 77.00  | 82.75 | 272.33 | 304.35 | 5.00  | 3.80 | 3.00  | 1.10 | 18.67 | 10.85 | 107.33 | 286.30 | 21.00 | 12.15 | 241.67 | 99.05  | 0.553 | 0.476 | 0.779 | 0.030 | 0.043 | 0.070 | 59.7 | 63   | 68.2 | 78.2 | 8.63  | 14.99 | 19.86 | 15.47 | 31.6 | 49.3  | 45.3  | 2.3 | 1.8 | 2   | 1.9 |
| 1987 | 45.00 | 35.20 | 518.20 | 616.20 | 4.60 | 0.60 | 212.80 | 219.40 | 82.40  | 102.50 | 21.20 | 0.00  | 46809.40 | 46600.30 | 87.40  | 85.30 | 290.60 | 288.80 | 9.60  | 4.80 | 7.20  | 1.60 | 18.40 | 7.90  | 81.60  | 272.80 | 17.40 | 16.50 | 228.80 | 138.00 | 1.477 | 0.862 | 0.784 | 0.082 | 0.078 | 0.071 | 51.7 | 58.8 | 69.8 | 77.6 | 9.86  | 12.32 | 17.98 | 16.69 | 84.8 | 77.9  | 50    | 2.2 | 2.9 | 2.1 | 1.7 |
| 1988 | 58.25 | 41.89 | 491.50 | 493.56 | 2.00 | 1.33 | 321.50 | 172.22 | 42.75  | 71.44  | 0.00  | 5.89  | 46788.75 | 46517.22 | 105.50 | 94.44 | 269.00 | 250.89 | 13.50 | 3.78 | 7.75  | 1.33 | 24.75 | 7.56  | 83.50  | 253.44 | 19.75 | 11.33 | 268.75 | 129.11 | 0.934 | 3.208 | 1.421 | 0.054 | 0.288 | 0.130 | 55.2 | 64.2 | 77.8 | 80.1 | 8.46  | 13.21 | 16.12 | 15.18 | 50.4 | 194.9 | 75.3  | 2.9 | 3.2 | 2.1 | 1.7 |
| 1989 | 55.67 | 51.55 | 455.00 | 495.09 | 1.67 | 2.36 | 259.33 | 199.82 | 102.33 | 85.00  | 23.33 | 7.00  | 46677.67 | 46710.45 | 105.33 | 96.91 | 232.33 | 258.64 | 12.33 | 3.64 | 0.00  | 1.00 | 22.67 | 12.64 | 98.67  | 265.09 | 7.00  | 9.55  | 273.33 | 146.09 | 0.695 | 0.516 | 0.432 | 0.041 | 0.046 | 0.040 | 48.8 | 64.3 | 64.8 | 69   | 11.59 | 13.41 | 18.43 | 15.04 | 38.8 | 55.4  | 35.7  | 2.9 | 2.1 | 1.9 | 2   |
| 1990 | 46.00 | 55.75 | 518.50 | 481.25 | 0.00 | 0.00 | 209.50 | 134.75 | 80.50  | 114.25 | 0.00  | 0.00  | 46983.50 | 46833.75 | 106.00 | 94.00 | 290.50 | 245.25 | 2.00  | 9.00 | 0.00  | 4.25 | 20.50 | 13.75 | 246.00 | 299.25 | 30.50 | 24.25 | 191.00 | 142.50 | 1.162 | 1.346 | 1.864 | 0.070 | 0.120 | 0.174 | 50.3 | 63.5 | 73.8 | 78.9 | 13.30 | 15.86 | 19.37 | 16.50 | 76.9 | 111.7 | 113.8 | 3.3 | 2   | 1.3 | 1.7 |
| 1991 | 56.20 | 30.83 | 450.00 | 459.50 | 1.40 | 0.00 | 220.60 | 127.50 | 89.40  | 107.50 | 0.00  | 0.00  | 47122.60 | 46626.67 | 107.20 | 82.33 | 221.00 | 245.17 | 4.40  | 2.50 | 5.20  | 0.00 | 19.00 | 4.00  | 161.20 | 301.17 | 11.20 | 24.50 | 188.80 | 76.00  | 0.712 | 1.589 | 1.252 | 0.044 | 0.141 | 0.118 | 54.4 | 59   | 79   | 77.7 | 8.87  | 16.46 | 19.51 | 15.36 | 55.6 | 105.9 | 77.2  | 2.7 | 2.1 | 1.7 | 1.8 |

Pine #4

| Year | Al_lat | Al_ear | Ca_lat | Ca_ear | Cl_lat | Cl_ear | Cu_lat | Cu_ear | Fe_lat | Fe_ear | Hg_lat | Hg_ear | inc_lat  | inc_ear  | K_lat  | K_ear  | Mn_lat | Mn_ear | P_lat | P_ear | S_lat | S_ear | Si_lat | Si_ear | Sr_lat | Sr_ear | Ti_lat | Ti_ear | Zn_lat | Zn_ear | Iv_jn_ind | Iv_jl_ind | Iv_au_ind | Iv-Vys_jn | Iv-Vys_jl | Iv-Vys_aug | Hum_may | Hum_jn | Hum_jl | Hum_aug | T_may | T_jn  | T_jl  | T_aug | Prec_jn | Prec_jl | Prec_aug | Wind_my | Wind_jn | Wind_jl | Wind_aug |
|------|--------|--------|--------|--------|--------|--------|--------|--------|--------|--------|--------|--------|----------|----------|--------|--------|--------|--------|-------|-------|-------|-------|--------|--------|--------|--------|--------|--------|--------|--------|-----------|-----------|-----------|-----------|-----------|------------|---------|--------|--------|---------|-------|-------|-------|-------|---------|---------|----------|---------|---------|---------|----------|
| 1981 | 65.33  | 53.12  | 404.33 | 614.62 | 14.33  | 3.27   | 293.33 | 236.62 | 18.33  | 46.96  | 1.19   | 8.67   | 47296.00 | 47622.96 | 75.67  | 81.38  | 217.33 | 251.96 | 23.33 | 7.38  | 11.67 | 3.42  | 22.67  | 15.85  | 0.00   | 192.54 | 20.33  | 14.85  | 336.00 | 225.77 | 0.267     | 1.200     | 1.422     | 0.011     | 0.102     | 0.130      | 47.7    | 56.4   | 68.8   | 76.4    | 12.15 | 17.13 | 16.67 | 14.94 | 15.3    | 99      | 88.2     | 3.2     | 1.7     | 2.1     | 1        |
| 1982 | 62.89  | 52.13  | 434.33 | 573.38 | 3.33   | 2.31   | 262.78 | 215.75 | 17.00  | 42.81  | 0.00   | 1.63   | 47652.67 | 47519.44 | 79.44  | 91.06  | 221.78 | 257.06 | 20.22 | 8.06  | 6.44  | 3.00  | 23.44  | 15.25  | 41.22  | 166.94 | 13.78  | 11.31  | 309.67 | 215.81 | 0.403     | 0.954     | 0.550     | 0.018     | 0.083     | 0.050      | 53.2    | 56.3   | 72.5   | 70.6    | 10.00 | 17.06 | 17.21 | 15.34 | 24.5    | 72.8    | 42.9     | 2.3     | 2.1     | 1.8     | 2        |
| 1983 | 57.80  | 45.29  | 376.80 | 543.67 | 12.40  | 4.19   | 210.60 | 208.29 | 50.00  | 71.29  | 0.00   | 1.38   | 48246.40 | 47640.86 | 99.40  | 116.90 | 209.60 | 244.86 | 19.40 | 12.05 | 16.60 | 7.05  | 38.20  | 15.38  | 21.40  | 200.62 | 11.40  | 20.81  | 268.60 | 202.24 | 0.947     | 1.212     | 0.681     | 0.044     | 0.107     | 0.061      | 50.7    | 54.3   | 68.8   | 75.7    | 7.59  | 16.11 | 16.45 | 15.26 | 61.2    | 102.8   | 43.5     | 2.4     | 1.9     | 1.7     | 1.5      |
| 1984 | 48.50  | 49.00  | 394.50 | 502.75 | 1.75   | 1.19   | 286.00 | 229.38 | 55.00  | 58.38  | 2.75   | 1.13   | 47900.50 | 47669.13 | 114.00 | 127.81 | 179.00 | 230.13 | 21.75 | 5.13  | 1.50  | 1.44  | 22.00  | 13.06  | 80.00  | 197.69 | 3.25   | 17.00  | 306.75 | 244.50 | 0.833     | 1.059     | 0.549     | 0.041     | 0.094     | 0.049      | 60.6    | 64     | 75.9   | 72.1    | 8.51  | 15.90 | 16.98 | 15.50 | 44.3    | 72      | 40.7     | 2.2     | 1.8     | 1.4     | 1.6      |
| 1985 | 40.00  | 43.43  | 396.75 | 515.50 | 0.00   | 3.00   | 245.50 | 193.64 | 67.25  | 49.29  | 0.00   | 1.50   | 47649.50 | 47844.29 | 114.75 | 144.21 | 203.75 | 227.86 | 5.25  | 4.43  | 6.00  | 2.86  | 17.75  | 15.93  | 27.75  | 149.14 | 15.50  | 20.86  | 383.50 | 209.14 | 1.778     | 1.286     | 0.865     | 0.091     | 0.115     | 0.078      | 53.9    | 66.7   | 75.2   | 76.6    | 8.28  | 14.28 | 18.04 | 15.25 | 84.5    | 95.1    | 53.2     | 2.9     | 1.7     | 1.2     | 1.7      |
| 1986 | 64.00  | 44.92  | 360.50 | 480.69 | 1.75   | 2.08   | 284.75 | 217.69 | 50.25  | 38.69  | 0.00   | 0.00   | 47830.75 | 47615.08 | 115.50 | 121.77 | 206.75 | 223.38 | 17.25 | 10.46 | 6.25  | 1.62  | 14.50  | 12.46  | 77.00  | 174.62 | 15.00  | 11.62  | 267.50 | 216.69 | 0.553     | 0.476     | 0.779     | 0.030     | 0.043     | 0.070      | 59.7    | 63     | 68.2   | 78.2    | 8.63  | 14.99 | 19.86 | 15.47 | 31.6    | 49.3    | 45.3     | 2.3     | 1.8     | 2       | 1.9      |
| 1987 | 48.50  | 50.70  | 345.50 | 455.50 | 0.00   | 2.30   | 310.50 | 226.40 | 26.00  | 44.60  | 0.00   | 0.70   | 47652.25 | 47691.70 | 113.00 | 120.10 | 229.25 | 216.70 | 15.50 | 9.80  | 3.00  | 4.80  | 21.50  | 18.90  | 6.75   | 141.00 | 18.50  | 21.90  | 311.50 | 226.80 | 1.477     | 0.862     | 0.784     | 0.082     | 0.078     | 0.071      | 51.7    | 58.8   | 69.8   | 77.6    | 9.86  | 12.32 | 17.98 | 16.69 | 84.8    | 77.9    | 50       | 2.2     | 2.9     | 2.1     | 1.7      |
| 1988 | 66.50  | 50.11  | 338.50 | 438.89 | 0.00   | 1.67   | 207.50 | 200.89 | 11.00  | 38.67  | 0.00   | 0.00   | 47908.00 | 47721.67 | 97.00  | 104.00 | 166.50 | 232.11 | 5.50  | 11.56 | 0.00  | 5.89  | 20.50  | 15.78  | 0.00   | 140.33 | 20.00  | 12.44  | 324.50 | 242.67 | 0.934     | 3.208     | 1.421     | 0.054     | 0.288     | 0.130      | 55.2    | 64.2   | 77.8   | 80.1    | 8.46  | 13.21 | 16.12 | 15.18 | 50.4    | 194.9   | 75.3     | 2.9     | 3.2     | 2.1     | 1.7      |
| 1989 | 57.00  | 43.25  | 325.50 | 434.92 | 0.00   | 2.83   | 325.50 | 259.17 | 14.50  | 42.75  | 0.00   | 5.75   | 48109.00 | 47685.83 | 116.00 | 116.17 | 220.00 | 227.50 | 0.00  | 7.25  | 3.00  | 4.25  | 16.50  | 17.83  | 37.00  | 103.50 | 11.50  | 13.33  | 396.00 | 263.83 | 0.695     | 0.516     | 0.432     | 0.041     | 0.046     | 0.040      | 48.8    | 64.3   | 64.8   | 69      | 11.59 | 13.41 | 18.43 | 15.04 | 38.8    | 55.4    | 35.7     | 2.9     | 2.1     | 1.9     | 2        |
| 1990 | 72.00  | 51.00  | 434.00 | 411.43 | 2.50   | 3.14   | 284.50 | 231.71 | 36.00  | 36.86  | 0.00   | 0.00   | 48323.50 | 47919.71 | 118.00 | 124.00 | 190.00 | 205.43 | 9.00  | 6.86  | 0.00  | 0.86  | 21.50  | 23.43  | 54.50  | 133.29 | 54.50  | 12.29  | 317.00 | 258.14 | 1.162     | 1.346     | 1.864     | 0.070     | 0.120     | 0.174      | 50.3    | 63.5   | 73.8   | 78.9    | 13.30 | 15.86 | 19.37 | 16.50 | 76.9    | 111.7   | 113.8    | 3.3     | 2       | 1.3     | 1.7      |
| 1991 | 54.25  | 46.90  | 352.00 | 409.00 | 1.75   | 4.00   | 277.75 | 181.10 | 27.75  | 44.10  | 0.00   | 4.90   | 47450.50 | 48186.70 | 80.50  | 99.80  | 214.25 | 200.90 | 19.75 | 10.70 | 8.25  | 3.20  | 23.75  | 13.40  | 0.00   | 149.40 | 18.75  | 11.40  | 273.25 | 212.30 | 0.712     | 1.589     | 1.252     | 0.044     | 0.141     | 0.118      | 54.4    | 59     | 79     | 77.7    | 8.87  | 16.46 | 19.51 | 15.36 | 55.6    | 105.9   | 77.2     | 2.7     | 2.1     | 1.7     | 1.8      |

Pine #5

|      | Al_lat | Al_ear | Ca_lat | Ca_ear | Cl_lat | Cl_ear | Cu_lat | Cu_ear | Fe_lat | Fe_ear | Hg_lat | Hg_ear | inc_lat  | inc_ear  | K_lat  | K_ear  | Mn_lat | Mn_ear | P_lat | P_ear | S_lat | S_ear | Si_lat | Si_ear | Sr_lat | Sr_ear | Ti_lat | Ti_ear | Zn_lat | Zn_ear | Iv_jn_ind | Iv_jl_ind | Iv_au_ind | Iv-Vys_jn | Iv-Vys_jl | Iv-Vys_aug | Hum_may | Hum_jn | Hum_jl | Hum_aug | T_may | T_jn  | T_jl  | T_aug | Prec_jn | Prec_jl | Prec_aug | Wind_my | Wind_jn | Wind_jl | Wind_aug |
|------|--------|--------|--------|--------|--------|--------|--------|--------|--------|--------|--------|--------|----------|----------|--------|--------|--------|--------|-------|-------|-------|-------|--------|--------|--------|--------|--------|--------|--------|--------|-----------|-----------|-----------|-----------|-----------|------------|---------|--------|--------|---------|-------|-------|-------|-------|---------|---------|----------|---------|---------|---------|----------|
| 1981 | 62.11  | 51.24  | 433.89 | 553.59 | 2.33   | 0.76   | 267.33 | 181.55 | 49.11  | 64.03  | 3.00   | 5.66   | 47533.89 | 47361.59 | 54.67  | 58.17  | 135.00 | 182.97 | 11.44 | 3.59  | 10.78 | 3.59  | 26.11  | 15.31  | 9.56   | 148.93 | 8.67   | 13.97  | 338.89 | 237.03 | 0.267     | 1.200     | 1.422     | 0.011     | 0.102     | 0.130      | 47.7    | 56.4   | 68.8   | 76.4    | 12.15 | 17.13 | 16.67 | 14.94 | 15.3    | 99      | 88.2     | 3.2     | 1.7     | 2.1     | 1        |
| 1982 | 58.69  | 47.03  | 523.77 | 484.77 | 6.38   | 2.35   | 244.54 | 184.61 | 62.62  | 59.71  | 2.85   | 7.00   | 47037.31 | 47526.87 | 61.23  | 57.68  | 168.23 | 163.42 | 13.62 | 9.06  | 7.92  | 4.84  | 24.15  | 17.84  | 90.77  | 122.74 | 10.38  | 18.45  | 268.08 | 242.29 | 0.403     | 0.954     | 0.550     | 0.018     | 0.083     | 0.050      | 53.2    | 56.3   | 72.5   | 70.6    | 10.00 | 17.06 | 17.21 | 15.34 | 24.5    | 72.8    | 42.9     | 2.3     | 2.1     | 1.8     | 2        |
| 1983 | 54.00  | 47.95  | 526.00 | 450.27 | 8.67   | 1.55   | 321.00 | 158.50 | 31.67  | 73.36  | 6.00   | 2.41   | 46996.67 | 47667.05 | 42.67  | 55.68  | 123.33 | 166.27 | 24.00 | 7.59  | 18.33 | 1.27  | 39.67  | 17.73  | 0.00   | 126.73 | 0.00   | 18.14  | 373.67 | 190.82 | 0.947     | 1.212     | 0.681     | 0.044     | 0.107     | 0.061      | 50.7    | 54.3   | 68.8   | 75.7    | 7.59  | 16.11 | 16.45 | 15.26 | 61.2    | 102.8   | 43.5     | 2.4     | 1.9     | 1.7     | 1.5      |
| 1984 | 81.00  | 45.36  | 358.00 | 531.52 | 3.50   | 1.12   | 293.00 | 154.12 | 34.50  | 62.00  | 0.00   | 2.44   | 46923.50 | 47225.44 | 62.00  | 70.92  | 137.50 | 180.68 | 14.00 | 7.44  | 7.50  | 2.72  | 27.00  | 17.56  | 0.00   | 178.56 | 3.00   | 14.56  | 378.00 | 200.96 | 0.833     | 1.059     | 0.549     | 0.041     | 0.094     | 0.049      | 60.6    | 64     | 75.9   | 72.1    | 8.51  | 15.90 | 16.98 | 15.50 | 44.3    | 72      | 40.7     | 2.2     | 1.8     | 1.4     | 1.6      |
| 1985 | 52.67  | 42.65  | 381.00 | 531.26 | 1.33   | 0.78   | 236.33 | 141.39 | 43.67  | 68.00  | 3.33   | 5.48   | 47441.33 | 47184.39 | 87.67  | 91.65  | 179.33 | 178.91 | 11.67 | 5.00  | 6.67  | 2.78  | 21.00  | 20.13  | 86.00  | 176.35 | 10.67  | 17.43  | 312.00 | 196.83 | 1.778     | 1.286     | 0.865     | 0.091     | 0.115     | 0.078      | 53.9    | 66.7   | 75.2   | 76.6    | 8.28  | 14.28 | 18.04 | 15.25 | 84.5    | 95.1    | 53.2     | 2.9     | 1.7     | 1.2     | 1.7      |
| 1986 | 53.20  | 43.69  | 329.20 | 515.94 | 1.40   | 0.94   | 187.40 | 161.69 | 27.00  | 67.19  | 36.60  | 6.44   | 47508.80 | 47173.38 | 85.80  | 128.06 | 147.60 | 190.44 | 0.00  | 3.88  | 8.20  | 3.75  | 28.00  | 12.63  | 41.60  | 201.50 | 8.40   | 18.06  | 268.00 | 173.94 | 0.553     | 0.476     | 0.779     | 0.030     | 0.043     | 0.070      | 59.7    | 63     | 68.2   | 78.2    | 8.83  | 14.99 | 19.86 | 15.47 | 31.6    | 49.3    | 45.3     | 2.3     | 1.8     | 2       | 1.9      |
| 1987 | 54.80  | 43.73  | 391.20 | 541.09 | 4.60   | 0.45   | 211.60 | 132.82 | 54.60  | 67.82  | 0.00   | 12.18  | 47387.00 | 47210.45 | 103.40 | 133.00 | 170.80 | 169.91 | 13.20 | 12.00 | 5.20  | 2.73  | 30.60  | 14.18  | 45.40  | 212.64 | 6.60   | 18.00  | 221.40 | 173.00 | 1.477     | 0.862     | 0.784     | 0.082     | 0.078     | 0.071      | 51.7    | 58.8   | 69.8   | 77.6    | 9.86  | 12.32 | 17.98 | 16.69 | 84.8    | 77.9    | 50       | 2.2     | 2.9     | 2.1     | 1.7      |
| 1988 | 60.67  | 42.67  | 380.00 | 420.67 | 0.00   | 0.58   | 270.33 | 116.58 | 15.33  | 61.42  | 0.00   | 3.25   | 47117.33 | 47416.75 | 116.00 | 98.33  | 158.67 | 158.33 | 24.33 | 5.83  | 6.67  | 0.67  | 15.33  | 12.83  | 70.00  | 186.42 | 10.00  | 16.33  | 338.00 | 154.33 | 0.934     | 3.208     | 1.421     | 0.054     | 0.288     | 0.130      | 55.2    | 64.2   | 77.8   | 80.1    | 8.46  | 13.21 | 16.12 | 15.18 | 50.4    | 194.9   | 75.3     | 2.9     | 3.2     | 2.1     | 1.7      |
| 1989 | 49.00  | 47.33  | 372.00 | 419.33 | 16.67  | 1.08   | 231.67 | 122.00 | 35.00  | 71.33  | 0.00   | 0.00   | 46968.00 | 47101.83 | 125.33 | 120.17 | 157.00 | 171.25 | 15.33 | 7.92  | 4.33  | 1.00  | 13.67  | 19.58  | 35.33  | 166.17 | 18.33  | 22.92  | 318.00 | 181.25 | 0.695     | 0.516     | 0.432     | 0.041     | 0.046     | 0.040      | 48.8    | 64.3   | 64.8   | 69      | 11.59 | 13.41 | 18.43 | 15.04 | 38.8    | 55.4    | 35.7     | 2.9     | 2.1     | 1.9     | 2        |
| 1990 | 58.00  | 41.00  | 458.00 | 453.20 | 8.00   | 4.40   | 224.50 | 149.20 | 61.00  | 86.40  | 0.00   | 8.60   | 47153.50 | 47198.60 | 160.50 | 117.60 | 173.50 | 157.20 | 3.00  | 6.80  | 6.00  | 3.40  | 23.50  | 10.40  | 54.50  | 184.40 | 23.50  | 21.60  | 319.00 | 223.20 | 1.162     | 1.346     | 1.864     | 0.070     | 0.120     | 0.174      | 50.3    | 63.5   | 73.8   | 78.9    | 13.30 | 15.86 | 19.37 | 16.50 | 76.9    | 111.7   | 113.8    | 3.3     | 2       | 1.3     | 1.7      |
| 1991 | 45.40  | 46.86  | 315.60 | 463.86 | 2.60   | 1.14   | 185.60 | 146.57 | 60.60  | 69.14  | 0.00   | 0.00   | 47393.60 | 47063.43 | 89.80  | 122.43 | 150.40 | 179.71 | 9.80  | 4.29  | 3.00  | 1.29  | 27.80  | 14.29  | 38.60  | 130.29 | 3.80   | 24.00  | 299.80 | 156.43 | 0.712     | 1.589     | 1.252     | 0.044     | 0.141     | 0.118      | 54.4    | 59     | 79     | 77.7    | 8.87  | 16.46 | 19.51 | 15.36 | 55.6    | 105.9   | 77.2     | 2.7     | 2.1     | 1.7     | 1.8      |

|      |       |       |        |        |      |      |        |        |        |        |       |      |          |          |        |        |        |        |       |      |      |      |       |       |        |        |       |       |        |        |       |       |       |       |       |       |      |      |      |      |       |       |       |       |      |       |       |     |     |     |     |
|------|-------|-------|--------|--------|------|------|--------|--------|--------|--------|-------|------|----------|----------|--------|--------|--------|--------|-------|------|------|------|-------|-------|--------|--------|-------|-------|--------|--------|-------|-------|-------|-------|-------|-------|------|------|------|------|-------|-------|-------|-------|------|-------|-------|-----|-----|-----|-----|
| 1981 | 55.00 | 45.11 | 583.38 | 703.55 | 3.13 | 2.53 | 315.25 | 257.05 | 104.75 | 88.63  | 11.63 | 1.13 | 46644.13 | 46784.21 | 56.63  | 71.05  | 230.38 | 278.39 | 8.75  | 7.58 | 3.00 | 4.79 | 25.25 | 16.68 | 116.13 | 208.26 | 26.50 | 18.53 | 225.00 | 161.74 | 0.267 | 1.200 | 1.422 | 0.011 | 0.102 | 0.130 | 47.7 | 56.4 | 68.8 | 76.4 | 12.15 | 17.13 | 16.67 | 14.94 | 15.3 | 99    | 88.2  | 3.2 | 1.7 | 2.1 | 1   |
| 1982 | 48.91 | 47.29 | 375.64 | 627.94 | 0.64 | 1.53 | 378.45 | 226.35 | 50.55  | 96.15  | 14.36 | 6.00 | 46654.09 | 46993.03 | 45.64  | 61.44  | 152.18 | 255.50 | 15.36 | 8.71 | 8.82 | 2.32 | 28.36 | 18.97 | 19.36  | 227.03 | 21.91 | 17.68 | 298.09 | 114.18 | 0.403 | 0.954 | 0.550 | 0.018 | 0.083 | 0.050 | 53.2 | 56.3 | 72.5 | 70.6 | 10.00 | 17.06 | 17.21 | 15.34 | 24.5 | 72.8  | 42.9  | 2.3 | 2.1 | 1.8 | 2   |
| 1983 | 57.00 | 45.09 | 529.88 | 595.98 | 0.75 | 1.37 | 307.38 | 230.07 | 84.50  | 91.17  | 9.63  | 5.83 | 46491.88 | 46801.09 | 60.38  | 58.98  | 236.13 | 234.52 | 13.50 | 4.72 | 5.25 | 2.24 | 26.75 | 13.11 | 87.50  | 226.30 | 8.88  | 16.28 | 243.00 | 119.74 | 0.947 | 1.212 | 0.681 | 0.044 | 0.107 | 0.061 | 50.7 | 54.3 | 68.8 | 75.7 | 7.59  | 16.11 | 16.45 | 15.26 | 61.2 | 102.8 | 43.5  | 2.4 | 1.9 | 1.7 | 1.5 |
| 1984 | 58.00 | 43.34 | 532.50 | 565.71 | 3.75 | 1.26 | 317.38 | 211.74 | 82.38  | 84.20  | 11.63 | 7.83 | 47016.25 | 46806.00 | 68.88  | 56.97  | 239.38 | 233.94 | 10.38 | 4.17 | 1.63 | 0.97 | 22.38 | 10.83 | 99.63  | 233.29 | 9.88  | 20.83 | 180.63 | 123.89 | 0.833 | 1.059 | 0.549 | 0.041 | 0.094 | 0.049 | 60.6 | 64   | 75.9 | 72.1 | 8.51  | 15.90 | 16.98 | 15.50 | 44.3 | 72    | 40.7  | 2.2 | 1.8 | 1.4 | 1.6 |
| 1985 | 47.75 | 41.78 | 513.38 | 587.44 | 0.00 | 0.59 | 286.00 | 212.69 | 85.38  | 87.56  | 13.25 | 4.50 | 47171.25 | 46638.00 | 49.00  | 66.03  | 207.38 | 248.25 | 3.88  | 3.81 | 5.88 | 3.66 | 20.75 | 16.66 | 151.88 | 277.59 | 23.25 | 17.03 | 193.88 | 122.38 | 1.778 | 1.286 | 0.865 | 0.091 | 0.115 | 0.078 | 53.9 | 66.7 | 75.2 | 76.6 | 8.28  | 14.28 | 18.04 | 15.25 | 84.5 | 95.1  | 53.2  | 2.9 | 1.7 | 1.2 | 1.7 |
| 1986 | 33.17 | 43.30 | 519.33 | 581.35 | 0.00 | 2.83 | 250.67 | 219.70 | 77.00  | 86.57  | 5.50  | 1.52 | 47194.50 | 46667.39 | 63.67  | 63.04  | 247.67 | 250.61 | 10.83 | 7.17 | 0.00 | 2.09 | 18.50 | 14.70 | 119.00 | 225.57 | 8.67  | 14.04 | 230.17 | 130.17 | 0.553 | 0.476 | 0.779 | 0.030 | 0.043 | 0.070 | 59.7 | 63   | 68.2 | 78.2 | 8.63  | 14.99 | 19.86 | 15.47 | 31.6 | 49.3  | 45.3  | 2.3 | 1.8 | 2   | 1.9 |
| 1987 | 52.89 | 43.44 | 581.89 | 598.20 | 2.78 | 0.40 | 366.78 | 249.48 | 74.44  | 88.20  | 0.00  | 0.24 | 47164.11 | 46776.20 | 114.78 | 83.56  | 273.67 | 268.04 | 14.89 | 6.80 | 6.67 | 3.20 | 27.11 | 14.44 | 85.67  | 214.36 | 26.00 | 15.48 | 261.56 | 154.92 | 1.477 | 0.862 | 0.784 | 0.082 | 0.078 | 0.071 | 51.7 | 58.8 | 69.8 | 77.6 | 9.86  | 12.32 | 17.98 | 16.69 | 84.8 | 77.9  | 50    | 2.2 | 2.9 | 2.1 | 1.7 |
| 1988 | 51.71 | 48.00 | 510.71 | 559.60 | 0.86 | 1.60 | 271.29 | 256.95 | 105.00 | 95.80  | 15.43 | 2.30 | 47427.14 | 46881.45 | 110.29 | 109.70 | 263.29 | 270.75 | 17.86 | 5.55 | 9.71 | 4.45 | 25.14 | 15.15 | 106.43 | 234.80 | 27.86 | 16.35 | 255.71 | 125.80 | 0.934 | 3.208 | 1.421 | 0.054 | 0.288 | 0.130 | 55.2 | 64.2 | 77.8 | 80.1 | 8.46  | 13.21 | 16.12 | 15.18 | 50.4 | 194.9 | 75.3  | 2.9 | 3.2 | 2.1 | 1.7 |
| 1989 | 48.00 | 47.61 | 475.91 | 601.39 | 2.18 | 0.83 | 254.45 | 211.50 | 108.55 | 107.06 | 4.82  | 2.17 | 47048.64 | 46784.61 | 114.91 | 123.94 | 255.91 | 305.06 | 1.91  | 7.61 | 1.91 | 3.11 | 19.82 | 22.06 | 218.64 | 228.61 | 20.36 | 18.33 | 176.45 | 130.78 | 0.695 | 0.516 | 0.432 | 0.041 | 0.046 | 0.040 | 48.8 | 64.3 | 64.8 | 69   | 11.59 | 13.41 | 18.43 | 15.04 | 38.8 | 55.4  | 35.7  | 2.9 | 2.1 | 1.9 | 2   |
| 1990 | 56.50 | 44.67 | 457.50 | 612.33 | 0.00 | 2.17 | 280.75 | 241.58 | 91.75  | 99.33  | 26.00 | 5.75 | 47249.50 | 46851.08 | 109.00 | 132.00 | 239.00 | 315.33 | 1.00  | 7.50 | 2.50 | 4.83 | 23.50 | 22.00 | 182.00 | 226.50 | 35.00 | 20.42 | 201.50 | 162.83 | 1.162 | 1.346 | 1.864 | 0.070 | 0.120 | 0.174 | 50.3 | 63.5 | 73.8 | 78.9 | 13.30 | 15.86 | 19.37 | 16.50 | 76.9 | 111.7 | 113.8 | 3.3 | 2   | 1.3 | 1.7 |
| 1991 | 48.78 | 49.55 | 418.56 | 545.90 | 2.89 | 0.60 | 308.11 | 230.15 | 80.11  | 86.55  | 0.00  | 0.00 | 47118.22 | 46903.95 | 126.44 | 124.80 | 239.00 | 282.95 | 10.22 | 3.40 | 4.22 | 2.85 | 26.56 | 14.60 | 105.33 | 170.45 | 15.33 | 18.75 | 262.78 | 192.30 | 0.712 | 1.589 | 1.252 | 0.044 | 0.141 | 0.118 | 54.4 | 59   | 79   | 77.7 | 8.87  | 16.46 | 19.51 | 15.36 | 55.6 | 105.9 | 77.2  | 2.7 | 2.1 | 1.7 | 1.8 |
